# 1 Large-Scale, Multi-Year Microbial Community Survey of a Freshwater Trout 2 Aquaculture Facility

3 Todd Testerman<sup>a</sup>, Lidia Beka<sup>a\*</sup>, Stephen R. Reichley<sup>b<sup>o</sup></sup>, Stacy King<sup>b<sup>†</sup></sup>, Timothy J. Welch<sup>c</sup>, Gregory D.  
4 Wiens<sup>c</sup>, Joerg Graf<sup>a</sup>

5 <sup>a</sup>University of Connecticut, Department of Molecular and Cell Biology, Storrs, Connecticut, USA

6 <sup>b</sup>Riverence Provisions, Buhl, Idaho, USA

7 <sup>c</sup>National Center for Cool and Cold Water Aquaculture, Agricultural Research Service/U.S. Department of Agriculture,  
8 Kearneysville, West Virginia, USA

9 \*Present address: Lidia Beka, National Cancer Institute, National Institutes of Health, Bethesda, Maryland, USA

10 <sup>o</sup>Present address: Stephen R. Reichley, College of Veterinary Medicine and Global Center for Aquatic Health and Food Security,  
11 Mississippi State University, Starkville, Mississippi, USA

12 <sup>†</sup>Present address: Stacy King, College of Veterinary Medicine & Biomedical Sciences, Veterinary Diagnostic Laboratories,  
13 Colorado State University, Fort Collins, Colorado, USA

## 14 Abstract

15 Aquaculture is an important tool for solving growing worldwide food demand, but infectious diseases of  
16 the farmed animals represent a serious roadblock to continued industry growth. Therefore, it is essential  
17 to understand the microbial communities that reside within the built environments of aquaculture  
18 facilities to identify reservoirs of bacterial pathogens and potential correlations between commensal  
19 species and specific disease agents. Here, we present the results from three years of sampling a  
20 commercial rainbow trout aquaculture facility. The sampling was focused on the early-life stage  
21 hatchery building and included sampling of the facility source water and outdoor production raceways.  
22 We observed that the microbial communities residing on the abiotic surfaces within the hatchery were  
23 distinct from those residing on the surfaces of the facility water source as well as the production  
24 raceways, despite similar communities in the water column at each location. Within the hatchery  
25 building, most of the microbial classes and families within surface biofilms were also present within the  
26 water column, suggesting that these biofilms are seeded by a unique subgroup of microbial taxa from  
27 the water. Lastly, we detected a common fish pathogen, *Flavobacterium columnare*, within the  
28 hatchery, including at the source water inlet. Importantly, the relative abundance of this pathogen was

29 correlated with clinical disease. Our results characterized the microbial communities in an aquaculture  
30 facility, established that the hatchery environment contains a unique community composition, and  
31 demonstrated that a specific fish pathogen resides within abiotic surface biofilms and is seeded from the  
32 natural source water.

### 33 **Importance**

34 The complex microbial consortium residing in the built environment of aquaculture facilities is poorly  
35 understood. In this study, we provide a multi-year profile of the surface- and water-associated microbial  
36 communities of this biome. The results demonstrated that distinct community structures exist in the  
37 water and on surfaces. Furthermore, it was shown that a common and economically impactful bacterial  
38 pathogen, *F. columnare*, is continually introduced via the source water, is widespread within surface  
39 biofilms in the hatchery environment, and is likely amplified within these raceways but does not always  
40 cause disease despite being present. These results advance our understanding of pathogen localization  
41 at fish farms, show the interplay between host and environmental microbiomes, and reveal the  
42 importance of microbial community sequencing in aquaculture for identifying potential beneficial and  
43 harmful microbes. This study adds to the aquaculture microecology dataset and enhances our ability to  
44 understand this environment from a “One Health” perspective.

### 45 **Introduction**

46 Aquaculture has grown extensively over the past three decades, but disease caused by microbes poses  
47 one of the greatest threats to the continued growth of this industry (1). While the microbiomes of many  
48 farmed fish have been studied (2, 3), the microbial communities existing within the built environments  
49 of these animals, including raceway surfaces, have garnered less attention. These biomes are important  
50 as they offer potential insight into the distributions and abundances of specific pathogens. For example,  
51 in farms where untreated surface water is used, microbes from local upstream ecosystems flow into

52 raceways and form biofilms on their surfaces (4). A mature biofilm is typified by a sturdy and stable  
53 architecture, a protective matrix, and often, a highly dense and heterogenous assembly of microbial  
54 species. These features allow biofilms to serve as microbial banks, providing stable sites for genetic  
55 exchange that are relatively undisturbed by environmental hazards, including antibiotic and chemical  
56 treatments (5). Previous studies have demonstrated that most biofilm-associated microbes in  
57 aquaculture facilities are not harmful, and many may in fact be beneficial to the farmed fish. However, a  
58 subset of species are opportunistically pathogenic and can cause rapid and deadly disease outbreaks  
59 depending on host health, age, and environmental factors (6, 7).

60 Numerous methods are used to farm rainbow trout (*Oncorhynchus mykiss*) in the United States, with a  
61 common approach being the flow-through system in which natural spring or river water is diverted  
62 through the facility and eventually flows out (8). This type of system can provide relatively stable  
63 temperatures and consistent water quality based on the farm's location, source water type, flow, and  
64 distance the water travels above ground level (8). These farms are typically configured such that eggs  
65 and young fish are housed within a hatchery building, or early life-stage rearing facility, where they  
66 mature for several months (9). After reaching a specified size, fish are moved into outdoor raceways for  
67 grow-out before harvesting. Although disease can occur at any step in this process, generally the  
68 younger individuals are at greatest risk relative to the older individuals. Due to an immature immune  
69 system and difficulties with vaccination, rapid and significant mortality events occur often in the  
70 hatchery setting (10).

71 Two bacterial species, *Flavobacterium columnare* and *Flavobacterium psychrophilum*, have been shown  
72 to impact the early life stages of farmed rainbow trout. *F. columnare* causes columnaris disease (CD) (11)  
73 and has recently been divided into four species based on genomic differences, with each species being  
74 associated with varying virulence levels in laboratory studies (12). *F. psychrophilum* causes bacterial  
75 cold-water disease (BCWD), which is often observed in immature cold water fish species (13). There is

76 only one licensed vaccine for CD in catfish (14), and no licensed vaccines are available for BCWD within  
77 the United States (although a live-attenuated vaccine is in development (15–17). The lack of potent,  
78 universal, and well-tolerated vaccines for fish, especially for the youngest fish (fry), means that early and  
79 accurate detection of pathogens is essential for reducing the impacts of an outbreak. Current mitigation  
80 and prevention methods heavily rely on animal health surveillance targeting fish that exhibit symptoms  
81 of CD or BCWD (i.e., lethargy, abnormal swimming, lack of appetite, and skin lesions) for culturing and  
82 diagnostic PCR. If a pathogen is identified, intervention efforts commence. However, while important,  
83 this strategy focuses on identifying pathogenic *Flavobacterium* spp. during the period of clinical disease,  
84 when bacterial load is high and peak shedding occurs, overlooking initial infection events, the incubation  
85 period, the window of subclinical disease, asymptomatic shedding, and importantly, the point source.

86 Outbreaks of *F. psychrophilum* and *F. columnare* frequently re-occur in the hatchery environment  
87 between different production lots despite disinfection procedures. Such observations suggest that  
88 disinfection protocols are not entirely effective at removing these pathogens or that they are regularly  
89 re-introduced into this environment. Both of these flavobacterial pathogens have been shown to survive  
90 for long periods of time in freshwater at cool temperatures in the absence of their fish host (18, 19).  
91 They have also been shown to readily form biofilms, which may increase their ability to persist and  
92 survive treatment with some of the common disinfectants used in aquaculture (20, 21). Understanding  
93 the reservoirs and sources of these pathogens will be an important step in developing management  
94 practices for their control.

95 High throughput sequencing of the 16S rRNA gene in samples collected at various sites within raceways  
96 and the inflowing water provides crucial insights into the sites of pathogen localization within farms  
97 along with potential correlations with collected metadata. Coupled with standard health surveillance  
98 and culturing strategies, microbiome research at fish farms allows us to characterize the transient versus  
99 resident flora of the farm, identify possible interactions between microbiota, and direct the

100 development of new methods of pathogen control by identifying beneficial microbes for probiotic  
101 studies. Microbiome research at fish farms can thus inform and enhance outbreak control measures.  
102 In this work, we present a study of the microbiome of a rainbow trout facility spanning three  
103 consecutive years of sampling. We performed sequencing of a hypervariable region in the 16S rRNA  
104 gene to characterize the native microbial communities flowing into and out of the hatchery raceways as  
105 well as those growing within biofilms formed on structures in the raceways. We sequenced water and  
106 surface samples collected from three sites: Box Canyon Spring (BCS), the hatchery facility, and the  
107 outdoor raceways, with a primary focus on the hatchery facility. We also aimed to leverage our 16S  
108 rRNA survey data to simultaneously evaluate the presence of two pathogenic flavobacterial species and  
109 better understand pathogen refuge and transmission within the hatchery.

## 110 **Materials and Methods**

### 111 *Sample Sites and Site Metadata*

112 Samples were collected from and around a rainbow trout aquaculture facility in Idaho, USA. Sites  
113 included BCS (where the source water is obtained), the hatchery building, and the outdoor raceways.  
114 Collection was performed in October 2017, 2018, and 2019 and August 2019. The water temperature at  
115 each of the times of sampling was consistently 14-15°C. The upstream source water runs approximately  
116 1 mile from its spring source, receives ample natural sunlight, and possesses a population of wild  
117 rainbow trout and other fish species (Supplementary Figure 1). The water from this area is diverted  
118 through an enclosed pipe that flows ~0.5 miles directly into the hatchery building and outdoor  
119 raceways. The outdoor raceways remain uncovered and receive abundant sunlight. The hatchery  
120 building is entirely covered (minimal natural light) and contains 20 individual epoxy-painted concrete  
121 raceways into which water is piped before flowing out of the building and into the river. Hatchery  
122 raceway surfaces are regularly scrubbed with a coarse brush and visible debris are removed. Between

123 production lots, hatchery raceways are drained, pressure washed, soaked in a bleach solution (200 parts  
124 per thousand), and then allowed to dry. The available water quality parameters of the influent are as  
125 follows; 2017: 0.018 mg/L total phosphorus (TP) and 2.116 mg/L nitrate/nitrite. The available water  
126 quality parameters of the effluent are as follows; 2017: 0.092 mg/L TP, 2.083 mg/L nitrate/nitrite, 7.2  
127 mg/L dissolved oxygen (DO), < 31 mg/L chloride, and 1.0 mg/L ammonia (pH 8); 2018:– 0.156 mg/L TP,  
128 7.4 mg/L DO, < 31 mg/L chloride, and 0.5 mg/L ammonia (pH 8.1); 2019: 0.074 mg/L TP, 7.8 mg/L DO, <  
129 31 mg/L chloride, and 0.5 mg/L ammonia (pH 7.3).

### 130 *Surface Samples*

131 Surface samples were collected using sterile Whatman OmniSwabs (Maidstone, United Kingdom; cat. #  
132 WHAWB100035). In the indoor hatchery and outdoor raceways, an approximately 1-m long strip of the  
133 target surface was swabbed until the swab was visibly discolored. For the hatchery, polycarbonate  
134 baffles suspended in the center of the raceway were swabbed on both the front (flow facing) and back  
135 sides at the air/water interface and at 1 swab length below the surface (15 cm) (Supplementary Figure  
136 2). The metal tailscreens were only swabbed on the front side at the air/water interface. The epoxy-  
137 coated concrete walls of the raceways were typically swabbed at four depths, including the air/water  
138 interface, 1 swab length below the surface (15 cm), 2 swab lengths below the surface (30 cm), and at the  
139 bottom portion of the wall adjacent to the floor (variable depth as water levels change during  
140 production cycle). The walls along the length of the raceway were typically swabbed towards the front  
141 third, directly preceding the location of the first baffle. In 2019, a second location of the wall was also  
142 sometimes swabbed toward the back third of the raceway, directly behind the final baffle. For the  
143 outdoor raceways, swab samples were only collected from the air/water interfaces of walls. For BCS,  
144 wall swabs refer to any surfaces that were swabbed (typically rocks) below the water line at various  
145 depths. All swabs were immediately placed on ice and then frozen at -20°C for subsequent shipment and  
146 storage.

147 *Water Samples*

148 Six liters of water were collected for each water sample using sterile Whirlpak bags (Madison, WI, USA;  
149 cat. # B01447WA). In the hatchery, inflowing and outflowing water samples were typically collected at  
150 the inflow and outflow pipes of individual raceways. A few samples were collected from the “global”  
151 inflow, which refers to water collected from the primary water pipe before being diverted to individual  
152 raceways. Global outflow samples were collected from the main water pipe leading from the hatchery to  
153 the river. All water samples were filtered in 1-L aliquots using a previously described system and  
154 protocol (22). A 2 µm pore size prefilter (Sigma Aldrich, St. Louis, MO, USA; cat. # AP2502500) and a 0.2  
155 µm pore size Sterivex filter unit (Fisher Scientific, Waltham, MA, USA; cat. # SVGPL10RC) were collected.  
156 Attempts to filter the water with a Sterivex filter unit alone (to attain a single representative water  
157 sample) proved unfeasible, as clogging was a common occurrence. Prefilters and Sterivex units were  
158 immediately frozen at -20°C for shipment and storage.

159 *Fish Samples*

160 Fish from the outdoor raceways were captured via a net. Gill swabs were collected by direct swabbing of  
161 the outward facing gill tissue. Intestinal samples were collected following dissection of euthanized adult  
162 fish. Sampling of farmed and wild fish were approved under IACUC Animal Protocol A16-040.

163 *Diagnosis of CD and BCWD*

164 CD and BCWD were diagnosed by assessing the presence or absence of rod-shaped, oxidase-positive  
165 bacteria on gills and within the spleen and kidney tissues of multiple sampled fish.

166 *DNA Extraction*

167 DNA was isolated from the swab and tissue samples using a Qiagen PowerSoil DNA Isolation kit (Qiagen,  
168 Hilden, Germany; cat. # 12888-100) following the manufacturer’s protocol (23). For the prefilter

169 samples, DNA was isolated using a Qiagen PowerWater DNA Isolation kit (cat. # 14900-50-NF). DNA was  
170 extracted and isolated from Sterivex filters using the Qiagen Sterivex PowerWater DNA Isolation kit (cat.  
171 # 14600-50-NF) following the manufacturer's protocol. DNA was eluted in 50  $\mu$ L of buffer EB (Qiagen)  
172 and quantified with a Qubit HS dsDNA Assay kit (Life Technologies, Carlsbad, CA, USA). DNA extracts  
173 were stored at -20°C until ready for further processing.

#### 174 *PCR Amplification*

175 For each sample, the V4 hypervariable region of the 16S rRNA gene was amplified using previously  
176 validated primers that contained dual-end adapters for indexing as previously described (22, 23). Briefly,  
177 PCR reactions were set-up and performed in triplicate using the 515F forward and 806R reverse rRNA  
178 gene V4 primers (24) with Illumina MiSeq adaptors. A Bio-Rad C1000 Touch Thermocycler (Bio-Rad  
179 Laboratories Inc., Hercules, CA, USA) was used for PCR amplification with the following parameters: 94°C  
180 for 3 min followed by 30 cycles of 94°C for 45 sec, 50°C for 60 sec, and 72°C for 90 sec, with a final  
181 incubation at 72°C for 10 min.

#### 182 *Library Preparation and Sequencing*

183 PCR amplicons were prepared for sequencing as previously described (23). Briefly, reactions were  
184 pooled, and product presence and size were verified on a QIAxcel (Qiagen). PCR products were then  
185 cleaned using a GeneRead Size Selection kit (Qiagen; cat. # 180514) and diluted to 4 nM for sequencing  
186 on an Illumina MiSeq (Illumina, San Diego, CA, USA). A 500 cycle MiSeq Reagent kit v2 (Illumina; cat. #  
187 MS-102-2003) was used for paired-end sequencing of all libraries.

#### 188 *Bioinformatic Processing*

189 16S rRNA V4 gene sequence data were demultiplexed through BaseSpace (basespace.illumina.com),  
190 after which paired-end data were downloaded and imported into QIIME 2 (version 2021.4) (25). Then,



191 the reads underwent filtering, denoising, and dereplication using the DADA2 denoise-paired plugin (26).  
192 Sequences were taxonomically classified and compiled using the feature-classifier (27) and taxa  
193 (<https://github.com/qiime2/q2-taxa>) plugins. Taxonomy was assigned using a pre-trained Naïve Bayes  
194 classifier based on the Silva 132 99% OTU database ([https://www.arb-silva.de/documentation/release-  
195 138/](https://www.arb-silva.de/documentation/release-138/)) (28), with the reference trimmed down to the region bound by the 515F/806R primer pair. The  
196 default QIIME 2 processing parameters were used throughout the workflow except where otherwise  
197 noted.

198 ASV counts, taxonomy information, and a phylogeny were imported into RStudio (version 1.1.447) (29)  
199 from QIIME 2 using the qiime2R package (30). Phyloseq (version 1.36.0) (31), ggplot2 (version 3.3.5)  
200 (32), and microViz (version 0.7.9) (33) were used to calculate alpha and beta diversity as well as to  
201 generate barplot, boxplot, and ordination visualizations. Statistical testing was performed primarily  
202 using the vegan (version 2.5-7) (34) package.

### 203 *Controls and QC*

204 DNA extraction controls were processed for every extraction kit lot and used to assess potential kit  
205 contaminants and contamination occurring during DNA extraction. PCR negative controls were run with  
206 every PCR plate using molecular grade water in place of DNA to assess PCR reagent contaminants and  
207 contamination occurring during PCR. Mock community DNA controls (ZymoBIOMICS, Irvine, CA, USA;  
208 cat. # D6306) were also amplified during each PCR and used to assess PCR amplification biases.

209 QC steps performed during library preparation included the previously mentioned use of a QIAxcel to  
210 verify product presence and size. For the 2019 samples, 16S-targeted qPCR (35) was performed to verify  
211 that the total bacterial load was sufficient to overcome potential well-to-well contamination that may  
212 occur in plate-based PCR setups. For this specific group of samples, any sample with more than 10,000  
213 copies of the 16S rRNA gene (as determined by qPCR) was retained (total samples retained, 431/446,

214 97%). A number of samples did not return reads following sequencing, possibly due to failed PCR  
215 reactions (357/431, 83%). Following sequencing and initial processing, only samples with at least 10,000  
216 reads were retained for downstream analyses to guard against the effects of potential contamination on  
217 low biomass samples and increase the robustness of downstream analyses (163/357, 46%). Sequence  
218 quality filtering and chimeric sequence removal were also performed within QIIME 2 using the default  
219 parameters. Five separate MiSeq sequencing runs yielded 17,226,236 paired reads, and after the  
220 aforementioned QC steps were 6,131,752 with an average of 46,103 reads and a median of 39,325 reads  
221 per sample. The minimum and maximum read counts were 10,720 and 172,746, respectively. A total of  
222 25,790 ASVs were recovered across all samples.

### 223 *Statistical Analysis*

224 Alpha and beta diversity index calculations were performed on data rarefied to 10,000 reads.  
225 PERMANOVA testing was used to determine statistical significance of group differences for beta  
226 diversity indices. Shapiro-Wilk normality testing was used to justify specific statistical testing choices.  
227 Normally and non-normally distributed data were analyzed with t-tests and Wilcoxon signed-rank tests,  
228 respectively. Holm corrections were used to correct for testing with multiple comparisons, where  
229 appropriate. ANCOM-BC default parameters were used, and as recommended, the structural zero flag  
230 (neg\_lb) was set to “True” only for comparisons in which both groups had 30 or more samples per  
231 group. Tested classes had to be present in 10% of samples to be included. For all tests, a corrected p-  
232 value of 0.05 was required to achieve significance.

## 233 **Results**

### 234 *Sample Summary*

235 A total of 448 samples were collected at an aquaculture facility between 2017-2019, 163 of which were  
236 analyzed using an amplicon sequencing approach. As such, this study represents one of the most

237 extensive microbial surveys conducted on an aquaculture facility and provides important insight into  
238 microbial community composition across various sites at the farm, including but not limited to those  
239 colonizing the surfaces of raceway walls and other raceway structures, those residing within the water  
240 column, as well as those of fish skin and gills. The large and diverse dataset provides an opportunity to  
241 compare and correlate microbial communities according to specific farm site (hatchery, outdoor  
242 raceway, source water location, inflow, outflow, etc.), sample type (water, surface, etc.), and clinically  
243 diseased versus healthy fish populations.

#### 244 *Microbial Communities of Box Canyon Spring, the Hatchery, and the Outdoor Raceways*

245 We first compared the three sampling sites to determine whether the surface or water communities at  
246 each location were distinct from one another and assess if the type of sample or year of sampling were  
247 correlated with microbial community structure. The microbial communities of BCS (n = 15), the indoor  
248 hatchery facility (n = 134), and the outdoor raceways (n = 14) were compared, with water and surface  
249 biofilm samples sampled at all three sites. Additionally, intestine and gill swab samples were included  
250 from fish contained in the outdoor raceways to assess the degree of relatedness between host-  
251 associated and host-independent samples. Weighted Unifrac distances were calculated for all samples,  
252 and PCoA plots were prepared (Figure 1). Microbial community composition was largely dependent on  
253 sample type and sampling site. Sterivex and prefilter samples clustered separately from the surface  
254 (baffle, wall, tailscreen) samples (Figure 1A) indicating a different overall community composition in  
255 biofilms. Fish-associated samples (gills and intestines) clustered closer to the water samples (prefilters  
256 and Sterivex). Given the observed differences in microbial community composition between the  
257 surfaces (walls, baffles, and tailscreens) and the water (prefilter and Sterivex), these sample types were  
258 plotted and analyzed independently. Figure 1B only contains the surface samples (excludes water and  
259 fish samples) and shows distinct surface community clustering based on sampling site with BCS and the  
260 indoor hatchery resolving into separate clusters, whereas most of the outdoor raceways fell in between

261 these clusters. Figure 1C shows only water samples (prefilters and Sterivex) and lacks obvious clustering  
262 by sampling site, whereas a clear separation was noted between the prefilter and Sterivex sample types.  
263 This result indicates that the compositions of the communities residing in the water are fairly consistent  
264 from the source water to the hatchery and outdoor raceways. Bray-Curtis, Jaccard, and Unweighted  
265 Unifrac metrics were also calculated and are displayed in Supplementary Figures 3-5. These results  
266 showed overall agreement with those of the weighted Unifrac analysis, with the most obvious  
267 divergence being that the hatchery surface samples appeared more variable (larger confidence interval).  
268 However, the observed separation between surfaces at different sites and the lack of separation noted  
269 for water samples was still evident.

270 Next, we tested for the significance of these observed community differences that were attributable to  
271 sample site, sample type, and year of sampling (as well as their interactions) using PERMANOVA analysis  
272 of surface and water samples (Table 1). For surface biofilm samples, significant differences were  
273 observed when testing the effects of sample type, sample site, and year of sampling as well as the  
274 interaction of sample type and year and sampling site and year. The largest proportion of variance  
275 explained was due to sample site ( $R^2 = 0.2048$ ), with all other variables and interactions having  $R^2$  values  
276  $<0.10$ . Significant differences were noted for year but also for the interaction between sampling year  
277 and sample site/sample type, indicating that differences due to year of sampling may be due to  
278 differences in the types or locations samples were collected from in a given year as opposed to  
279 differences solely based on time. Beta dispersion testing was also performed to evaluate differences in  
280 dispersion between groups and aid in the interpretation of the PERMANOVA results. Significant  
281 differences in dispersion were noted between the walls and baffles ( $p = 0.0002$ ) and the years 2017 and  
282 2018 ( $p = 0.003$ ) as well as 2017 and 2019 ( $p = 0.011$ ). No significant differences were observed between  
283 the dispersion levels of sampling sites, further supporting the conclusion that the surface biofilm  
284 communities at the three sampled locations are distinct.

285 For water samples, sample type (prefilter vs. Sterivex) and sampling year were both significant factors,  
286 with sample type explaining a large amount of variance and sampling year explaining a smaller portion  
287 (Table 1). No interactions between variables were found to be significant. The beta dispersion results  
288 showed significant differences in dispersion between BCS and both the outdoor raceways ( $p = 0.0014$ )  
289 and hatchery ( $p = 0.0132$ ). Additionally, dispersion differences were noted between the years 2017 and  
290 2019 ( $p = 0.0355$ ).

291 Similar results to the ones found from weighted Unifrac were obtained from testing on Bray-Curtis,  
292 Jaccard, and unweighted Unifrac distances as well (Supplementary Tables 2- 4). The primary differences  
293 between the non-phylogenetic and phylogenetic metrics were smaller  $R^2$  values contributed by sampling  
294 site for surface samples and smaller  $R^2$  values contributed by sample type for water samples. These  
295 results indicate that sampling site has a significant and strong impact on the microbial community  
296 structure of the tested surfaces. This contrasts with the water samples where sampling site was not a  
297 significant factor influencing the microbial communities. Sample type was the primary significant  
298 variable explaining close to 50% of the variance in water samples (particle-associated prefilter vs.  
299 planktonic Sterivex). The beta dispersion analysis showed non-significant effects for these  
300 aforementioned variables, indicating that uneven variance between groups was not the driver of these  
301 significant differences. Significant results were obtained for the sampling year variable for both water  
302 and surfaces samples. However, uneven sampling on a yearly basis (significantly more samples in 2019  
303 than 2017 and 2018 as well as only sampling certain sites on a given year) may have been a driving  
304 factor for this detected difference and this could be reflected in the significant differences in the beta  
305 dispersion results.

306 Pairwise differential abundance testing using the ANCOM method showed that 36 bacterial classes were  
307 present at significantly higher relative abundances within the surface biofilms at the individual sampling  
308 sites (Supplementary Table 5). Between the hatchery and outdoor raceways, a significantly higher

309 relative abundance of Cyanobacteria ( $W = 22.49$ ) was noted in the outdoor raceways. This difference in  
310 Cyanobacteria abundance was also observed when testing BCS and the hatchery ( $W = 14.58$ ) with  
311 significantly higher levels found at BCS. This result is likely due to the hatchery receiving minimal natural  
312 sunlight, whereas BCS and the outdoor raceways receive ample amounts to support Cyanobacteria and  
313 algae. Additionally, significantly higher relative abundances of Deinococci were found at BCS ( $W = 3.51$ )  
314 and the outdoor raceways ( $W = 16.61$ ) compared to the hatchery, possibly owing to the survivability of  
315 this bacterial class in high UV environments (36). Alphaproteobacteria were detected at significantly  
316 higher relative abundances in the hatchery compared to BCS ( $W = 9.61$ ) and the outdoor raceways ( $W =$   
317  $5.06$ ), possibly indicating that this group fills the niche of photosynthetic microbes in low light  
318 environments and/or that high densities of fish support and seed Alphaproteobacteria.

#### 319 *Microbial Communities of the Indoor Hatchery Structure, Biofilms and Water*

320 Three primary structural components of each hatchery raceway [the epoxy-coated concrete walls of the  
321 raceways ( $n = 57$ ), the plastic baffles ( $n = 43$ ), and the metal tailscreens ( $n = 7$ )] were extensively  
322 sampled, and the associated microbial communities were analyzed. The inflowing and outflowing water  
323 was also filtered, and the microbial communities were profiled in two fractions [a  $2 \mu\text{m}$  or larger  
324 prefilter fraction ( $n = 8$ ) and a  $0.2\text{-}2 \mu\text{m}$  Sterivex fraction ( $n = 19$ )]. Since the prefilters comprised larger  
325 pore diameters than the Sterivex filters, we expected the microbial community sequenced from there to  
326 be more enriched in aggregate-lifestyle or particle-attached microbial cells, while the Sterivex data  
327 would show the remaining size-filtered fraction, largely represented by planktonic cells.

328 The total ASV count amongst these samples following filtering was 19,061. Twenty-five classes belonging  
329 to 18 phyla comprised the bulk of the microbial communities along with a group of reads unable to be  
330 classified to the phylum level (Bacteria\_Kingdom) (Figure 2, Supplementary Figure 6). The most  
331 dominant classes (totaling  $>90\%$  of the community composition of each sample type) were also

332 compared using boxplots (Supplementary Figure 7). The surface samples were predominantly composed  
333 of the classes Bacteroidia, Gammaproteobacteria, Alphaproteobacteria, and Verrucomicrobiae (Figure  
334 2). These classes were also major components of the microbial community within the water samples,  
335 although at generally lower relative abundances, and additional classes were present that are typically  
336 found in water (Figure 2, Supplementary Figure 7).

337 Phylogenetic (weighted and unweighted Unifrac) and non-phylogenetic (Bray-Curtis and Jaccard) beta  
338 diversity metrics were used to compare sample types within the hatchery (Figure 3). Sterivex and  
339 prefilter samples clustered independently from one another and all other sample types while  
340 maintaining a consistent microbial community profile. Surface biofilm samples typically showed greater  
341 variation in composition as demonstrated by larger confidence ellipses. Global PERMANOVA testing  
342 showed that sample type was a significant variable (Supplementary Table 6). Pairwise PERMANOVA  
343 results with multiple testing correction was performed for Bray-Curtis and Jaccard distances and showed  
344 significant differences between all sample types (all comparisons,  $p = 0.01$ ). These results indicate that  
345 the communities that reside on the surfaces in the hatchery are compositionally distinct from the  
346 seeding water communities, and they are also significantly different from one another.

347 Alpha diversity was calculated for all sample types (Figure 4). The water samples had significantly higher  
348 alpha diversity index values compared to the surface samples with the Sterivex samples having the  
349 highest. Amongst the surface samples, the walls had the highest Shannon index values followed by the  
350 baffles and then the tailscreens. Wilcoxon signed-rank tests were performed in a pairwise fashion for all  
351 groups and multiple comparisons correction was applied. For Shannon diversity, all comparisons were  
352 shown to have statistical significance ( $p < 0.05$ ) (Supplementary Table 7). For Faith phylogenetic  
353 diversity, all comparisons yielded significant differences ( $p < 0.05$ ), excluding the comparison between  
354 baffles and tailscreens ( $p = 0.125$ ) and Sterivex and prefilters ( $p = 0.125$ ) (Supplementary Table 8). These  
355 results indicate that the microbial diversity of the water communities was typically greater than that of

356 those residing on the surfaces and that surface type has a significant effect on the community richness  
357 and evenness, as the walls had consistently and significantly higher alpha diversity values than baffles or  
358 tailscreens.

359 A presence/absence comparison of the class composition by sample type (only including the inflowing  
360 prefilter and Sterivex water samples) showed that most of the microbial classes (13 out of 24) were  
361 shared between every sample type (Figure 5A). However, there were 7 classes detected in all samples  
362 excluding the tailscreens, 2 classes detected in only the water and on the walls, 1 class detected in only  
363 the water and on baffles, and 1 class only detected in water samples. At the family level, 88 of the 211  
364 represented families were present in all sample types (Figure 5B). An additional 28 families were only  
365 detected in the water samples, with 8 of those 28 being found exclusively in Sterivex samples. There  
366 were also 8 families not observed in Sterivex samples but present in prefilters and surface biofilm  
367 samples. There were 57 families detected in all sample types except tailscreen swabs, potentially due to  
368 the lower number of tailscreen samples analyzed compared to baffle and wall samples or actual  
369 differences in composition. These results reinforce the above alpha diversity results showing that the  
370 water communities are far richer than the surface communities. In addition, these findings revealed that  
371 28 microbial families seemingly fail to colonize the surface biofilm communities and that specific  
372 surfaces such as the walls contain microbial families (4 present only in water and walls) that baffles and  
373 tailscreens do not.

374 ANCOM-BC testing was used to compare the microbial communities of the three surface types at the  
375 class level (Supplementary Figure 8). This comparison showed that 8 bacterial classes were at a  
376 significantly higher relative abundance on walls than baffles, 9 were significantly higher on baffles than  
377 walls, 12 were significantly higher on walls than tailscreens, 1 was significantly higher on tailscreens than  
378 walls, and 11 were significantly higher on baffles than tailscreens. Classes consistently detected at  
379 significantly higher levels on walls compared with baffles and tailscreens included OM190,



380 Desulfuromonadia, Anaerolineae, and NB1-j. Classes consistently observed at significantly higher levels  
381 on baffles compared with walls and tailscreens included Verrucomicrobiae, Armatimonadia,  
382 Fimbriimonadia, and Blastocatellia. No classes were consistently detected at significantly higher levels  
383 on tailscreens compared with both walls and baffles (Bacteroidia was found at significantly higher levels  
384 on tailscreens than walls but not baffles). These results indicate that not only are there differences in  
385 the presence/absence of specific microbial groups but also that many shared groups are present at  
386 significantly different relative abundances depending on the surface type profiled.

### 387 *Pathogenic Flavobacterium Detection in the Hatchery*

388 *F. columnare* and *F. psychrophilum* species-level detection was performed on the same 16S rRNA  
389 dataset described above using a previously validated method (23). A total of 8,854 *F. columnare* reads  
390 were detected across 64 samples, and 9 *F. psychrophilum* reads were detected from a single sample,  
391 with the relative abundances of *F. columnare* ranging from 0.01 to 6.24%. *F. columnare* was detected for  
392 every sampling year and was detected in all sample types. In total, 8/20 Sterivex, 6/8 prefilters, 20/43  
393 baffle swabs, 29/69 wall swabs, and 2/7 tailscreen swabs tested positive for the presence of *F.*  
394 *columnare* (Table 2, Supplementary Table 9).

395 Based on recent taxonomic restructuring, *F. columnare* has been divided into four species: *F. columnare*,  
396 *Flavobacterium davisii*, *Flavobacterium oreochromis*, and *Flavobacterium covae* (12). A 16S rRNA V4  
397 gene sequence comparison was performed between the four type strain sequences and the 7 ASVs  
398 within this dataset that were assigned to *F. columnare* based on the Silva database (Supplementary  
399 Figure 9). The primary ASV in this dataset, comprising 74% of the recovered *F. columnare* reads, was an  
400 exact match to the type strain sequence for *F. columnare* as defined within the new taxonomy. An  
401 additional two ASVs comprising 13% of the *F. columnare* reads had a 1 bp difference from the type  
402 strain of *F. columnare*. Based on this alignment, confidence in discerning between *F. columnare*, *F.*

403 *davisii*, and *F. covae* solely using the V4 region of the 16S rRNA gene is tenuous at best, as each species  
404 differs by at most 2 bp.

405 The co-occurrence of *F. columnare* and the clinical manifestation of columnaris within a given raceway  
406 was also examined. Of the 12 raceways where *F. columnare* was detected, 3 had active columnaris  
407 infections, 1 had previously experienced a large columnaris outbreak but had no known active cases, 2  
408 had no active cases during sampling and no history of columnaris but experienced an outbreak following  
409 sampling, and 6 had no diagnosed columnaris infections during the production cycle. Typically, raceways  
410 where no columnaris was detected over the course of the production cycle had lower levels of *F.*  
411 *columnare* compared to raceways where columnaris was identified (Table 2). The relative levels of *F.*  
412 *columnare* in samples in which *F. columnare* reads were recovered (one or more reads) are compared in  
413 Figure 6. The levels of *F. columnare* in surface biofilm samples in the 6 healthy raceways was shown to  
414 be significantly lower than those detected in the 6 diseased raceways (Wilcoxon,  $p = 0.0028$ ) (Figure 6A).  
415 In contrast, the levels of *F. columnare* in water samples in the 6 healthy raceways were not significantly  
416 different than those detected in the 6 diseased raceways (Wilcoxon,  $p = 0.095$ ) (Figure 6B). This result  
417 may be in part due to the difference in sample size for these comparisons, as only 9 water samples were  
418 included versus 48 total surface samples (5 water samples were global inflow/outflow samples and were  
419 not included as disease status could not be attributed).

420 Inflowing and outflowing water samples both contained *F. columnare*, and in multiple cases, *F.*  
421 *columnare* was detected in both the inflow and outflow of the same individual raceway. However, a key  
422 difference in these specific cases and with inflow/outflow samples in general was consistently higher  
423 levels of *F. columnare* in the outflowing water. In the positive inflow samples, the median percent  
424 abundance of *F. columnare* was 0.016 and 0.038% for the Sterivex ( $n = 3$ ) and prefilter samples ( $n = 3$ ),  
425 respectively. In the positive outflow samples, the median percent abundance of *F. columnare* was 0.114  
426 and 1.294% for the Sterivex ( $n = 5$ ) and prefilter samples ( $n = 3$ ), respectively. As these are relative

427 abundances, it is possible *F. columnare* is not truly increasing but that other microbial taxa are  
428 decreasing in abundance, causing the percent abundance of *F. columnare* to increase. However, qPCR  
429 quantitation of the total microbial load within a subset of 2019 samples showed no significant  
430 differences in the total bacterial abundance between inflowing and outflowing prefilter samples (t-test,  
431  $p = 0.454$ ), indicating that *F. columnare* is likely being amplified in the raceway. Additionally, significantly  
432 higher relative abundances of *F. columnare* were detected in the outflowing water samples ( $n = 8$ ) than  
433 in the inflowing water samples ( $n = 6$ ) (Wilcoxon,  $p = 0.008$ ; Figure 6C). Furthermore, despite a limited  
434 number of samples collected at BCS, *F. columnare* was detected on the piping that flows water to the  
435 farm (7 reads) as well as on a submerged rock surface (44 reads). The detection of this pathogen in both  
436 the upstream location and the inflowing water reveals BCS as a likely source for recurrent introduction  
437 of *F. columnare* into the hatchery and outdoor raceways.

#### 438 **Discussion**

439 This study focused on the characterization and comparison of the microbial communities associated  
440 with the source water, outdoor raceways, and hatchery at a freshwater trout aquaculture facility over  
441 three years. The microbial communities of incoming water at inflow, outflow, and within raceways, as  
442 well as of surfaces of baffles, tail screens, and raceway walls were characterized. As young fish are  
443 particularly vulnerable to *F. columnare* and *F. psychrophilum*, the hatchery building was the most  
444 extensively sampled site, and five different sampling location types were characterized, compared, and  
445 screened for the presence of these specific flavobacterial pathogens.

446 The three environments in water-flow succession were compared to assess site-based variation of  
447 microbial communities within water and on surfaces. The water source location (BCS), hatchery, and  
448 outdoor raceways of the farm had consistent and mostly indistinguishable microbial communities within  
449 the water. Sampling site was not shown to be a significant variable contributing to differences in

450 microbial community structure in either the prefilter or Sterivex water fractions. This result indicates  
451 that the overall composition of the water community from the natural source spring through to the  
452 outflow from the farm is stable and not significantly different despite variations in light availability,  
453 animal abundance, and water quality parameters between the three sampled sites. Additionally,  
454 sampling year was noted as a significant variable influencing microbial community structure for water  
455 samples while only contributing a small amount of variance. Considering the uneven site sampling of  
456 water between years (e.g., the outdoor raceways were only sampled in 2017 while the hatchery was  
457 sampled 2017-2019), we consider the microbial communities in the water to be consistent on a yearly  
458 basis, providing the opportunity for greater reproducibility and stronger study conclusions. As the vast  
459 majority of samples were collected during October of each year (a small subset was from August 2019),  
460 seasonal variance in community composition may exist that was not explored in the present study.

461 Compared to the water samples, the surface biofilm communities were significantly different between  
462 the three sites. Hatchery surfaces contain a distinct community that differs from the communities  
463 residing within BCS and the outdoor raceways. A determining factor in this difference may well be that  
464 the hatchery raceways are a poor environment for bacterial (Cyanobacteria) and eukaryotic phototrophs  
465 (algae), whereas BCS and the outdoor raceways receive plentiful sunlight. ANCOM results indicated that  
466 Cyanobacteria were present at significantly higher levels on BCS surfaces and the outdoor raceway  
467 surfaces compared to hatchery surfaces.

468 Focusing on the hatchery environment specifically, water and surface communities were shown to be  
469 highly distinct. Alpha diversity calculations showed that the water communities were significantly more  
470 diverse than surface biofilm communities. Additionally, beta diversity results exhibited significantly  
471 different clustering of prefilter and Sterivex samples from wall, baffle, and tailscreen biofilm samples.  
472 Presence/absence comparison plotting showed every microbial class detected within the hatchery  
473 environment was present within the inflowing water community, and all but two microbial families were

474 detected in the inflowing water. This result indicates that while most biofilm constituents are likely  
475 seeded directly from the water community, only a distinct subset of this water community can establish  
476 itself within the surface biofilm community. It is also worth noting that the potential microbial  
477 contributions from the feed as well as the fish themselves was not accounted for in the present study.  
478 The two microbial families not detected in the water (Streptococcaceae and Nakamurellaceae) but  
479 detected on the surfaces may have originated from one of these two sources. Interestingly,  
480 Streptococcaceae were found at moderate levels in fish-associated samples from the outdoor raceways  
481 and were observed in outflowing water samples (data not shown), possibly implicating the farmed  
482 species as the source of these bacteria. Alternatively, it is possible these microbial classes are present in  
483 the water at low enough levels where detection through sequencing is not possible and amplification  
484 within the surface biofilms then allows for detection.

485 Specific surface types within the hatchery were also unique from one another. Walls were shown to  
486 have significantly higher alpha diversity than baffles and tailscreens. All three surface types were also  
487 shown to cluster in a significantly different manner regardless of the beta diversity metric used. The vast  
488 majority of the microbial classes and families detected were present in all three surface type  
489 communities but at different relative abundances. This result indicates that despite having identical  
490 sources (the water, fish, and feed), specific microbial taxa favor unique surfaces based on potential  
491 factors such as material type, surface roughness, nutrient concentrations, hydrodynamics, or other  
492 factors(37). Hydrodynamics, surface materials, and exposure time may well explain why the wall, a  
493 rough concrete surface located on the periphery of the raceway, has a greater community richness  
494 compared to corrugated polycarbonate baffles and stainless steel tailscreens (smoother surfaces located  
495 perpendicular to the flow of water(38)). In addition, the baffles are placed into the raceways several  
496 weeks after the raceway is seeded with fish, and the water level increases as the fish mature. Microbes  
497 with less adept adhesion mechanisms may be able to withstand this reduced flow force along the walls

498 compared to the medial flow force experienced on baffles and tailscreens. There was also an interesting  
499 subset of wall swabs that generally clustered distinctly from other wall swabs and surfaces (Figure 3).  
500 After reviewing available farm metadata, we are currently investigating the potential for fish age or  
501 water contact time as contributors to microbial community composition that may explain this unique  
502 clustering pattern.

503 The lone hatchery sample in which *F. psychrophilum* was detected was a baffle swab from a raceway  
504 towards the end of a columnaris outbreak. The detection of *F. psychrophilum* in only this sample may  
505 indicate that a coinfection was occurring within this raceway, but diagnosis was not undertaken as an  
506 infection cause was already established. A previous study at this farm site (but not at the hatchery  
507 facility) identified *F. psychrophilum* on sampled fish at a high frequency using qPCR (39). The lack of *F.*  
508 *psychrophilum*-positive samples in our dataset may be at least partly due to the reduced sensitivity of  
509 MiSeq sequencing for pathogen detection compared to traditional qPCR methods (23). *F. psychrophilum*  
510 may in fact be present but is simply at too low of a level to be reliably detected using this method.

511 The sampling of inflowing water shows a clear source of *F. columnare* that can act to reintroduce this  
512 and other pathogens from the untreated inflowing water into cleaned and disinfected raceways. *F.*  
513 *columnare* was detected over multiple years in both prefilter and Sterivex samples for inflowing source  
514 water. *F. columnare* was also detected within two surface biofilms in the upstream source environment,  
515 establishing its presence there. The populations of resident trout and other fish species in BCS together  
516 with the ability of *F. columnare* to survive independent of a host provides a reasonable scenario for  
517 reintroduction into the hatchery via the inflow. This reinforces the idea that this and other pathogens  
518 are likely endemic and the continued use of any approved and available vaccines, even when disease is  
519 not present, should be continued to avoid future outbreaks. We also observed that outflowing water  
520 samples from specific raceways where *F. columnare* was detected in surface biofilms showed higher  
521 relative abundances of *F. columnare* than the inflow. This result indicates the possible amplification of

522 this pathogen in surface biofilms within the raceway followed by shedding into the water where it is  
523 then detected in the outflow. Higher levels of *F. columnare* in biofilms and high levels in outflowing  
524 water was observed in raceways with no clinical signs of columnaris This finding supports the idea that  
525 this shedding likely occurs from either infected, subclinical fish (more fish-associated samples would be  
526 needed to investigate this) or from the surface biofilms themselves.

527 *F. columnare* was detected in all 5 sample types, including, most interestingly, within surface biofilms in  
528 both infected and healthy raceways. Intriguingly, *F. columnare* was detected in two swabbed locations  
529 of a raceway that had been emptied and mostly dried (data not shown). This result further solidifies the  
530 idea that *F. columnare* is ubiquitous in the environment and is adequately equipped with molecular  
531 mechanisms to reside within a complex biofilm community. This finding also highlights that the mere  
532 presence of these opportunistic pathogens does not necessarily have a direct correlation with a disease  
533 phenotype in the farmed species. Fish immune factors and general stress within the farm environment  
534 likely predispose fish to infection by opportunistic pathogens residing in the surrounding communities.  
535 However, this phenomenon does not completely invalidate the idea that preventing potentially  
536 pathogenic microbes from residing within the hatchery environment would be beneficial, as bacterial  
537 load likely plays a crucial role in disease occurrence as well. Increased exposure events due to higher  
538 levels of *F. columnare* entering the water from surface biofilm sources may also increase the likelihood  
539 for infections to occur. Our results showed that infected raceways had significantly higher levels of *F.*  
540 *columnare* in surface biofilms than healthy ones, but more work will be needed to establish whether this  
541 is a precursor to infection or the consequence of one.

542 In the present study, the communities residing on surfaces within a rainbow trout aquaculture facility  
543 were shown to be distinct from the water community that initially seeds these communities and are  
544 distinct from one another. The presence of the causative agent of a recurrent disease within the facility  
545 was also shown to be widespread, with inflowing water and surface biofilms acting as source and sink

546 for *F. columnare*. These results provide valuable insight into a mostly uncharacterized setting and  
547 provides a backdrop for future studies concerning microbial ecology of the built environment, biofilm  
548 maturation, antibiotic resistance, probiotic strain sourcing, and disease prevention.

#### 549 **Data Availability**

550 Raw read data are available in the NCBI SRA database under project ID [PRJNA821905](https://www.ncbi.nlm.nih.gov/sra/PRJNA821905).

#### 551 **Code Availability**

552 Code is available at <https://github.com/joerggraflab/Code-for-Testerman-Beka-2022>.

#### 553 **Acknowledgements**

554 We thank the University of Connecticut Microbial Analysis, Resources, and Services (MARS) facility for  
555 performing the sequencing work. We thank Chris Jackson and Dr. Jesse Trushenski for providing farm  
556 metadata. We thank Dr. Jeremiah Marden for providing feedback on the manuscript.



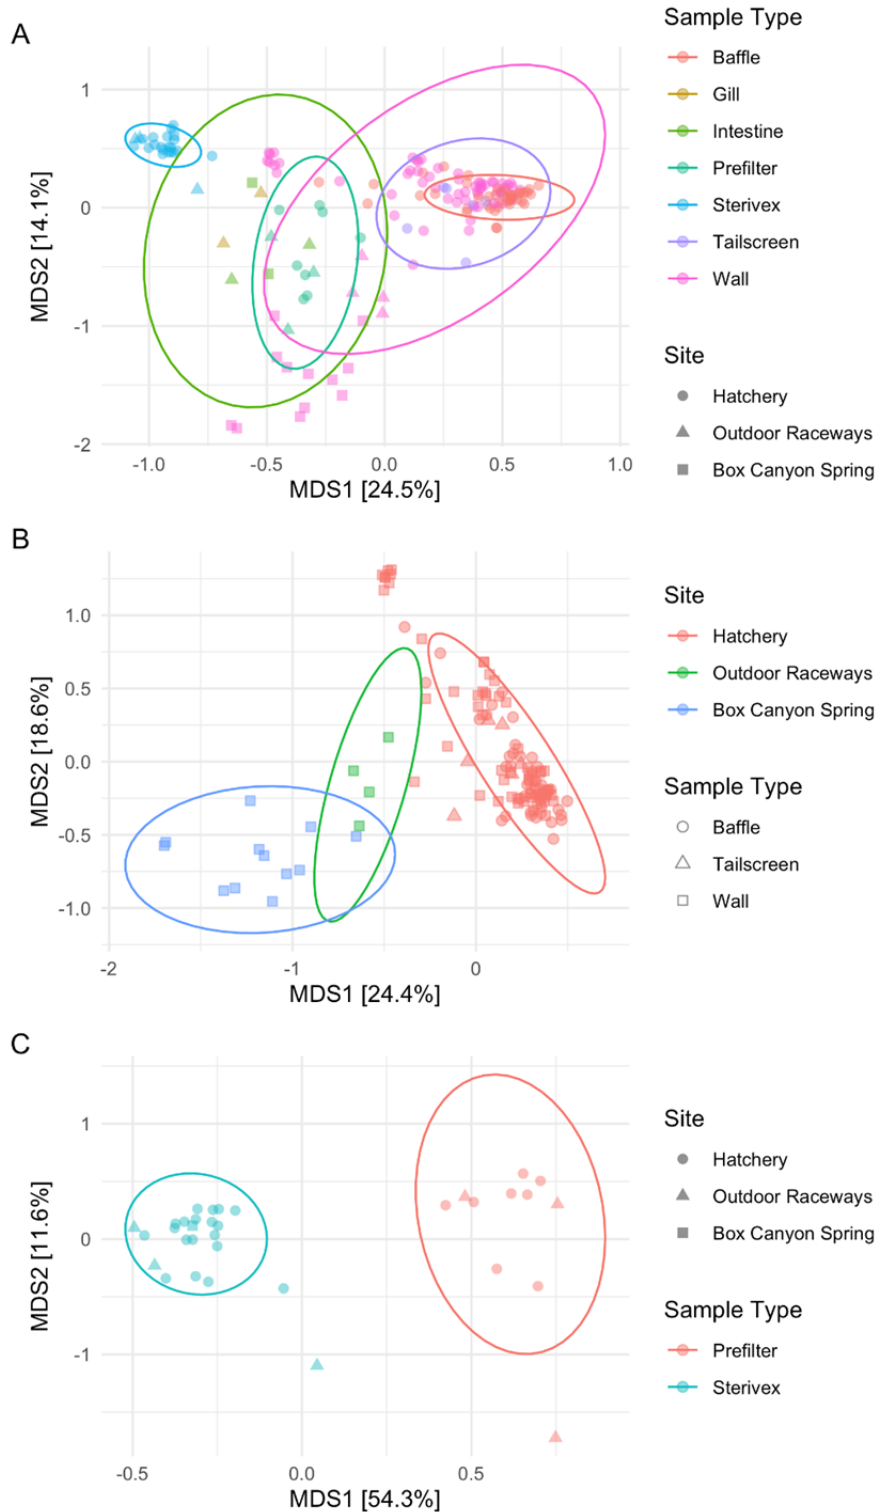

557

558 **Figure 1: Weighted Unifrac Ordinations of the Three Sampling Sites.** (A) All sample types, (B) surface  
559 samples only, and (C) water samples only from three sampling sites with 95% confidence ellipses. Three  
560 samples or more were required for an ellipse to be drawn for a particular category. Samples are colored  
561 by most significant contributing variables.

562

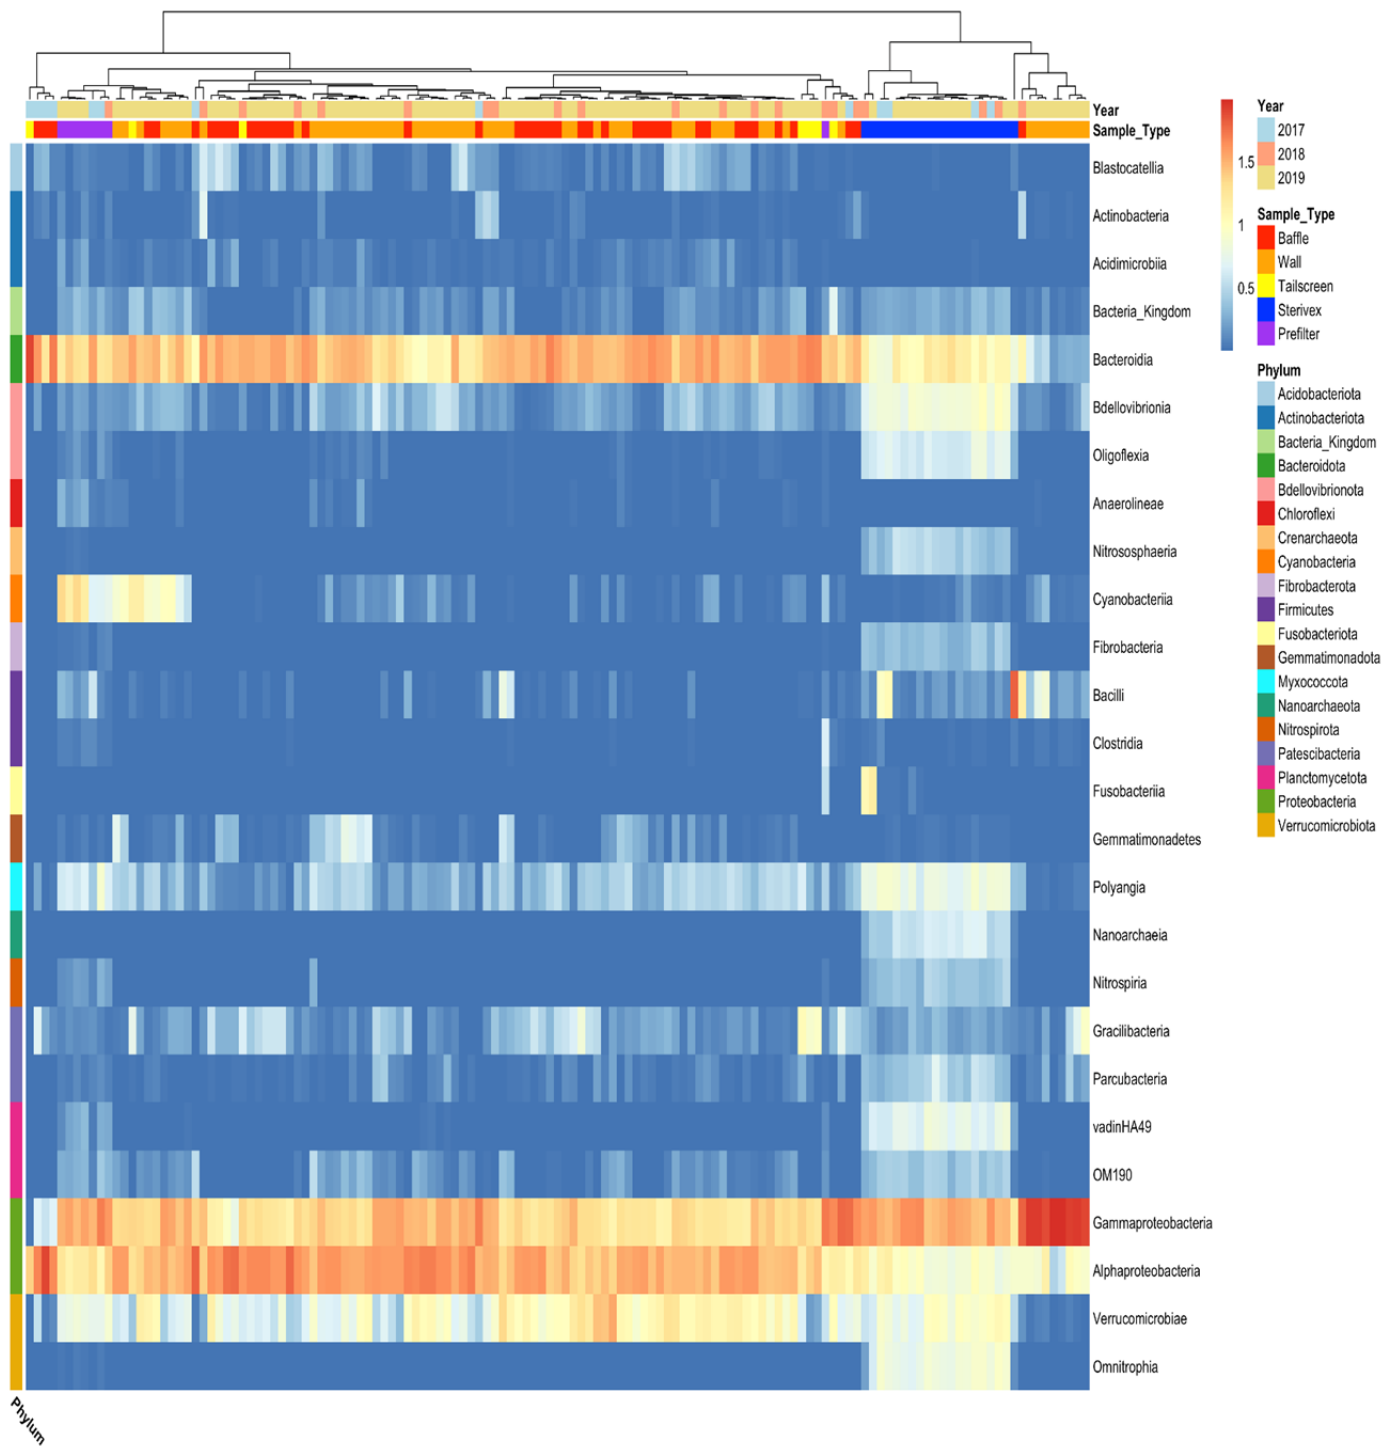

563

564 **Figure 2: Log-Scaled Heatmap of Bacterial and Archaeal Abundances at the Class Level in the Hatchery.**

565 Per sample composition is presented vertically, and samples have been clustered using Pearson  
566 correlation values. Phyla are annotated on the left, and classes are grouped based on phylum.

567

568

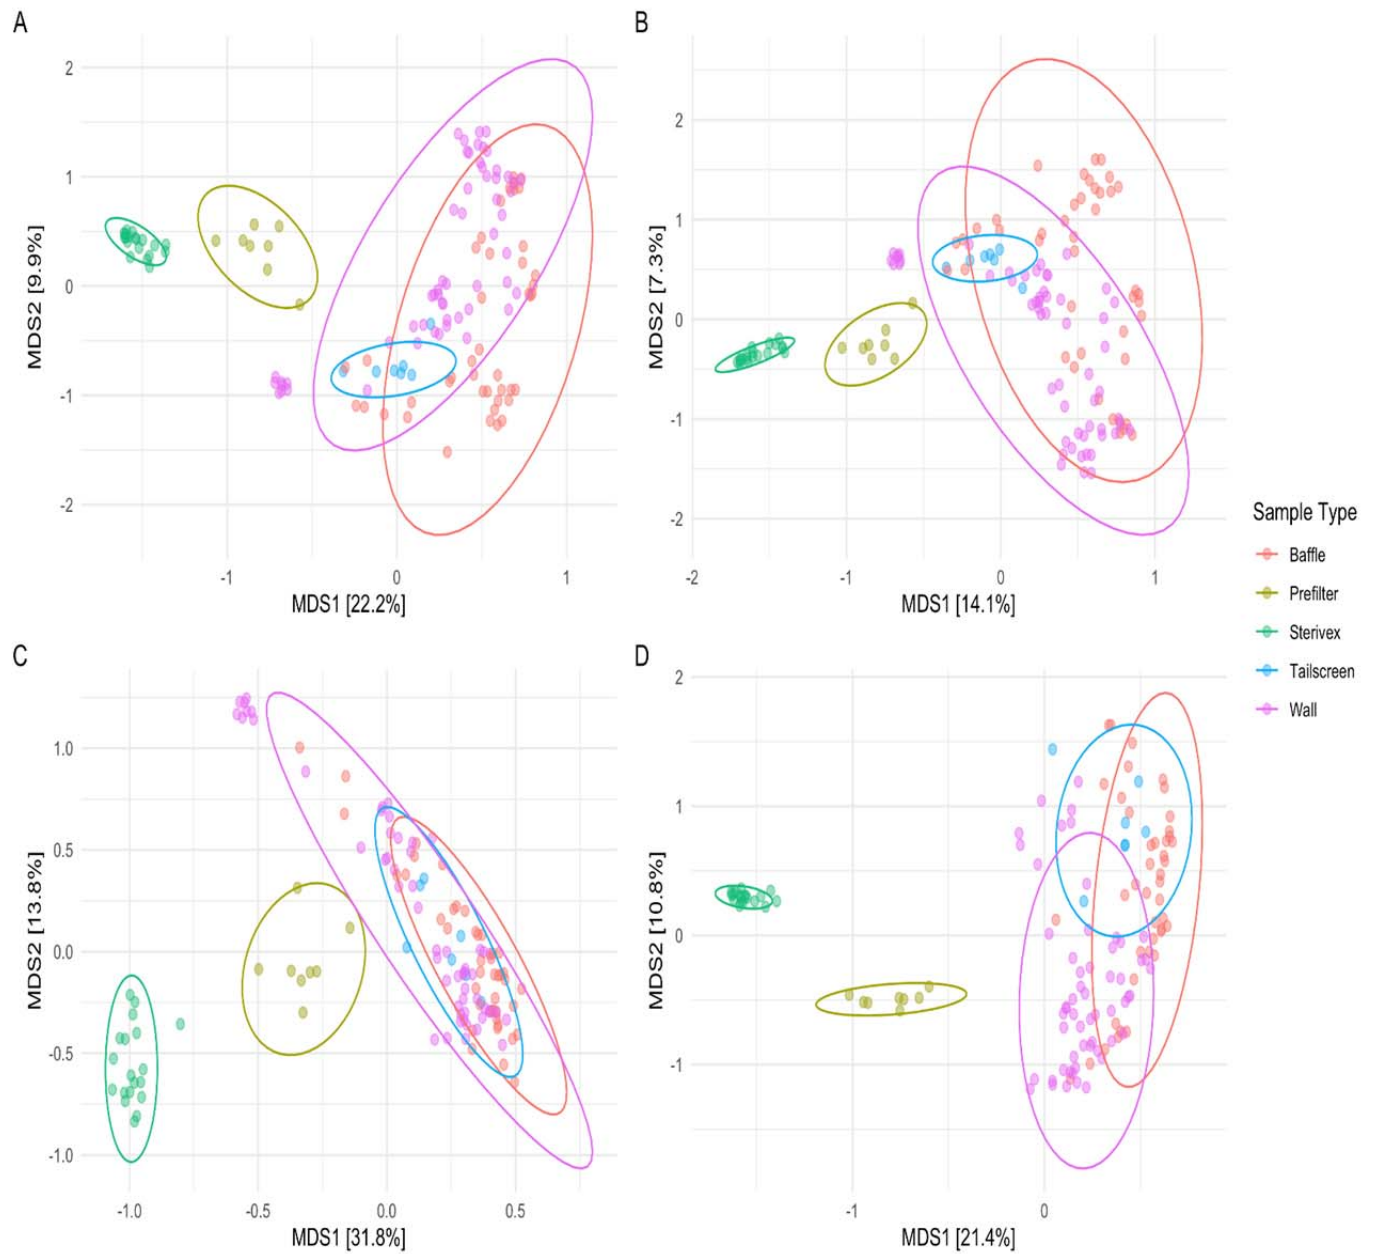

569

570 **Figure 3: Beta Diversity by Sample Type in the Hatchery.** (A) Bray-Curtis, (B) Jaccard, (C) Weighted  
571 Unifrac, and (D) Unweighted Unifrac distance metrics colored by sample type with 95% confidence  
572 ellipses.

573

574

575

576

577

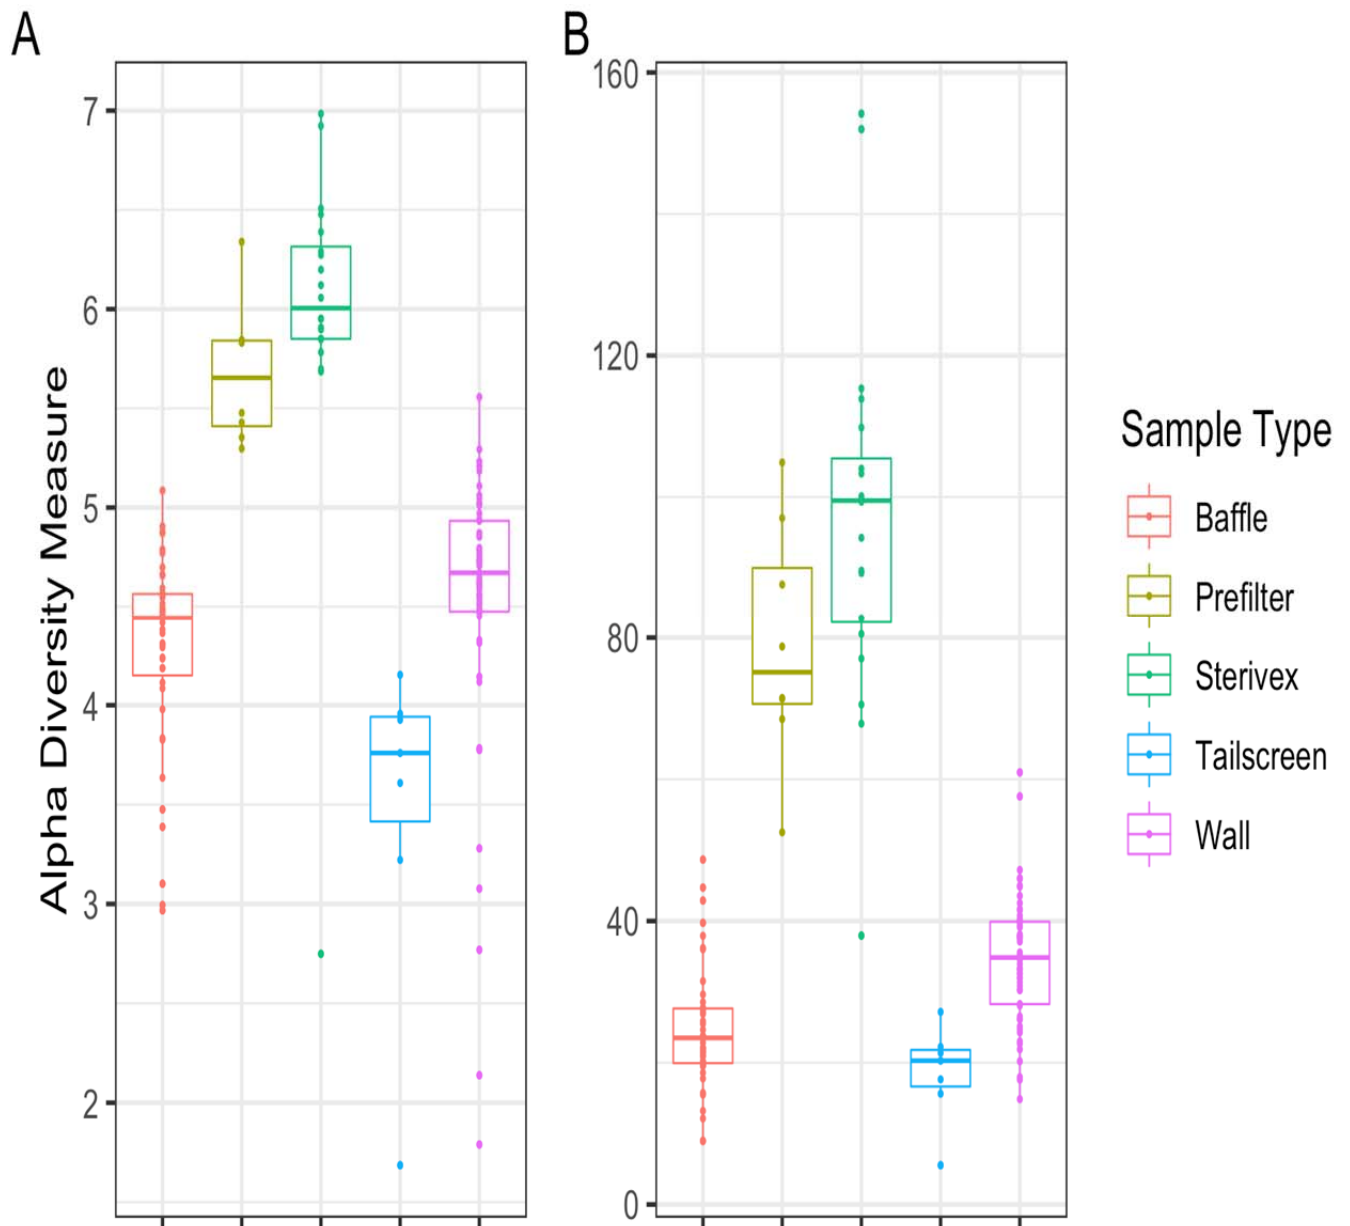

578

579 **Figure 4: Alpha Diversity by Sample Type in the Hatchery.** (A) Shannon diversity index and (B) Faith  
580 phylogenetic diversity values were calculated for all samples and arranged by sample type. Samples  
581 were rarefied to 10,000 reads before calculating alpha diversity index values.

582

583

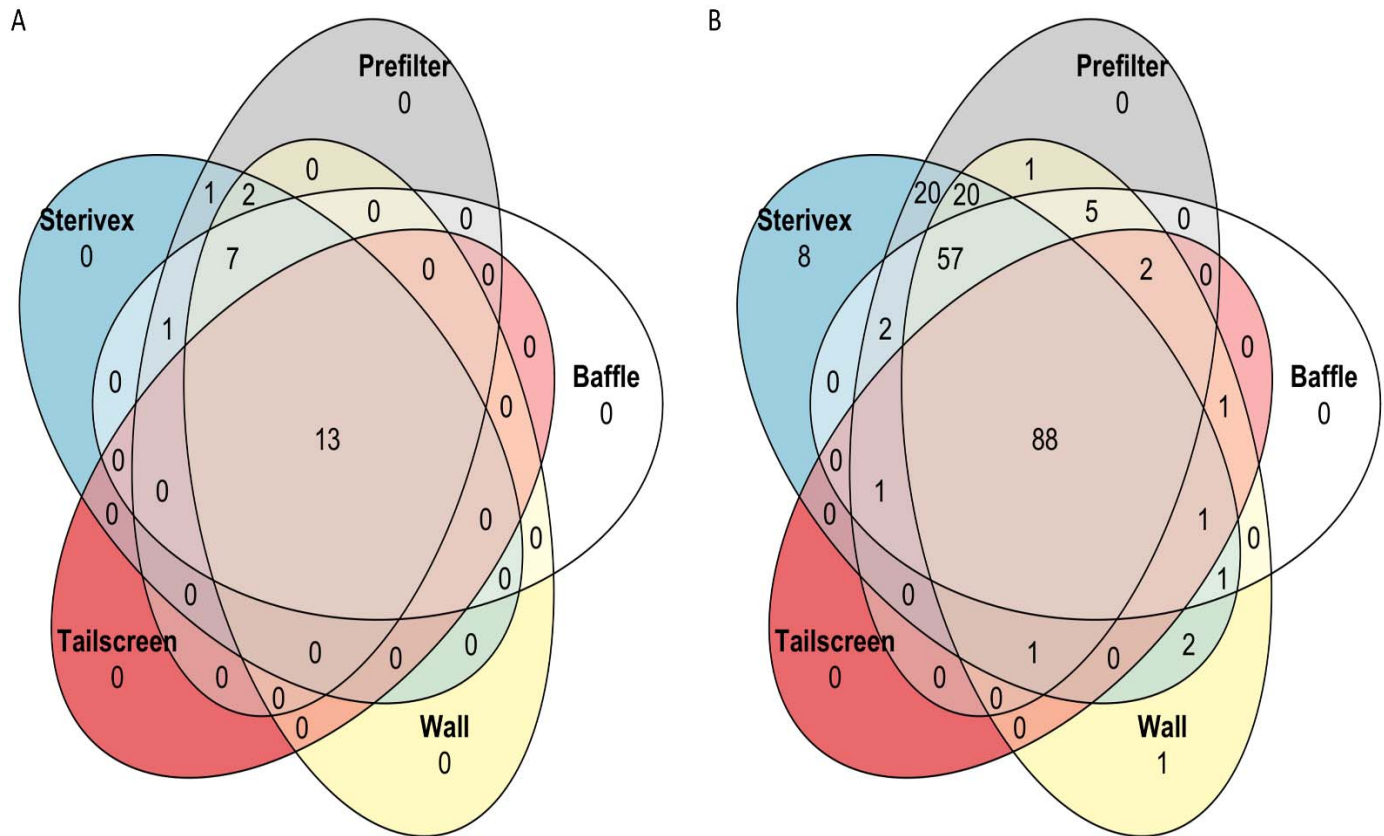

584

585 **Figure 5: Venn Diagrams of Shared Microbial Classes and Families by Sample Type in the Hatchery.**

586 Presence/absence summary of (A) shared microbial classes and (B) shared microbial families stratified  
587 by sample type. Microbial classes had to contribute at least 1,000 reads to one or more samples to be  
588 included in this comparison. Microbial families had to contribute at least 100 reads to one or more  
589 samples to be included in this comparison. Only inflowing water samples were included.

590

591

592

593

594

595

596

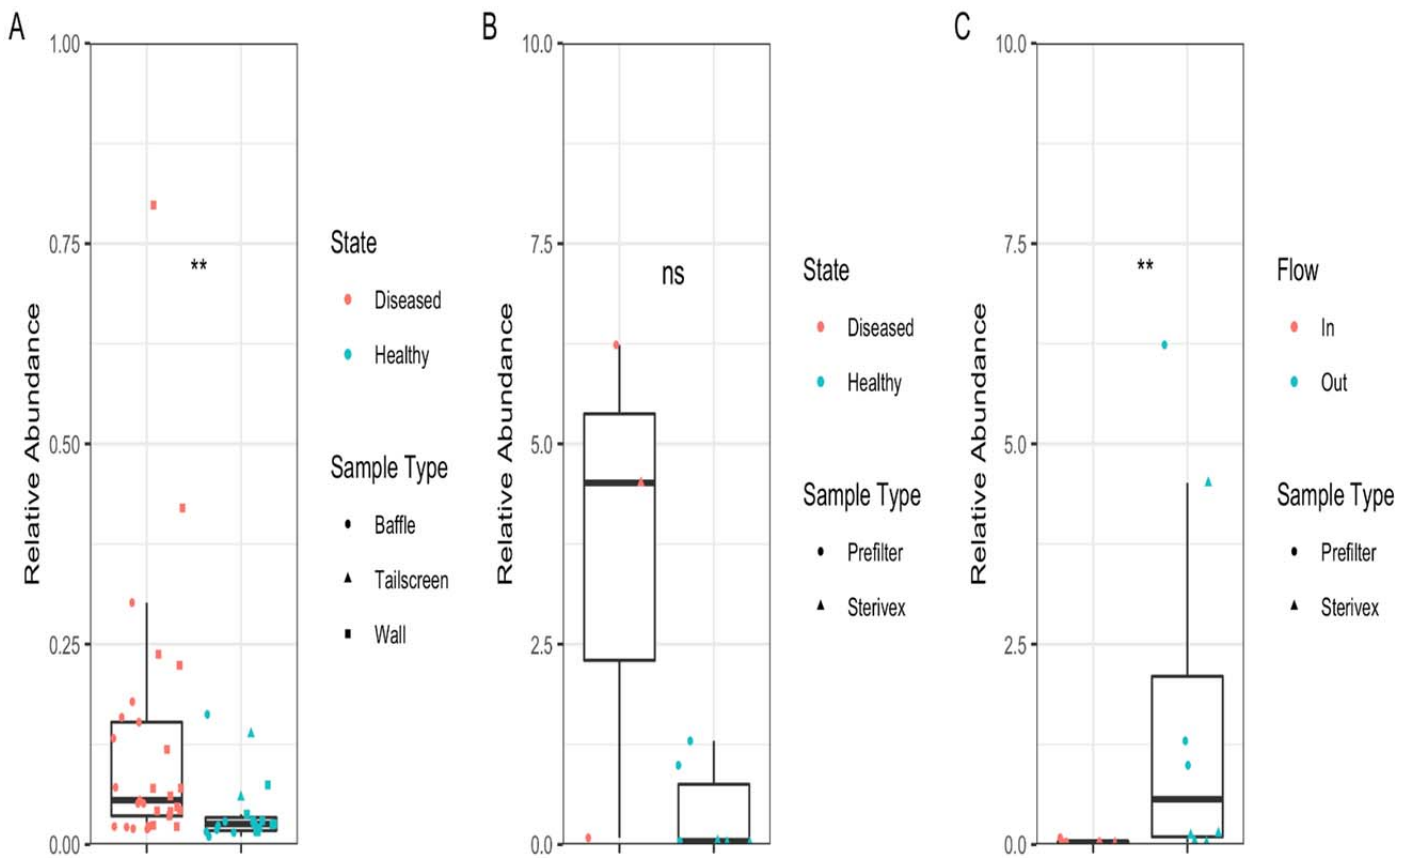

597

598 **Figure 6: Relative Abundances of *F. columnare* in the Hatchery.** Boxplots display the distribution of  
599 relative abundances from (A) surface samples grouped by raceway disease status and (B) water samples  
600 grouped by raceway disease status and (C) flow direction. Only samples with one or more *F. columnare*  
601 reads were included. Global inflow and outflow water samples were not included in disease state figures  
602 as water from healthy and diseased raceways would be collected in these samples. Wilcoxon signed-  
603 rank tests were performed to test for differences. ns = not significant.

604

605

606

607

608

609

610

611

612

613 **Table 1: PERMANOVA Testing of Weighted Unifrac Distances for Surface and Water Samples at the**  
 614 **Three**

|                                        | Surfaces |                | Water  |                |
|----------------------------------------|----------|----------------|--------|----------------|
|                                        | p        | R <sup>2</sup> | p      | R <sup>2</sup> |
| <b>Sample Type</b>                     | 0.0001   | 0.0817         | 0.0001 | 0.4918         |
| <b>Sampling Year</b>                   | 0.0001   | 0.0320         | 0.0489 | 0.0374         |
| <b>Sampling Site</b>                   | 0.0001   | 0.2048         | 0.3606 | 0.0298         |
| <b>Sample Type: Year</b>               | 0.0003   | 0.0390         | 0.0626 | 0.0325         |
| <b>Sampling Site: Year<sup>1</sup></b> | 0.0002   | 0.0251         |        |                |
| <b>Sample Type: Site<sup>1</sup></b>   |          |                | 0.2200 | 0.0176         |

615 **Sites.**  
 616 <sup>1</sup>Due to sample  
 617 sparsity  
 618 for  
 619 specific  
 620 sites,  
 621 testing  
 622 could  
 623

624 not be performed on these interactions

625

626

627

628

629

630

631

632

633

634

635

636

637

638

639

640

641

642

643

644

645 **Table 2: Percent Abundance and Frequency of Detection of *F. columnare*.**

| Year | Raceway ID | Wall Fc%   | Baffle Fc% | Tailscreen Fc% | Inflow Sterivex Fc% | Inflow Prefilter Fc% | Outflow Sterivex Fc% | Outflow Prefilter Fc% | Days from First Feed at Sampling | Daily % Mortality at Sampling | Mortality % at Sampling | Cumulative % Mortality | Columnaris Diagnosed |
|------|------------|------------|------------|----------------|---------------------|----------------------|----------------------|-----------------------|----------------------------------|-------------------------------|-------------------------|------------------------|----------------------|
| 2017 | 6          | N/A        | 0 (0/2)    | 0.06 (1/1)     | N/A                 | N/A                  | N/A                  | 1.29 (1/1)            | 71                               | 0.017                         | 1.93                    | 1.97                   | -                    |
|      | 8          | N/A        | 0 (0/1)    | N/A            | N/A                 | N/A                  | N/A                  | N/A                   | 50                               | 0.045                         | 1.68                    | 1.94                   | -                    |
|      | 14         | N/A        | 0 (0/1)    | N/A            | N/A                 | N/A                  | N/A                  | N/A                   | 64                               | 0.119                         | 2.96                    | 3.57                   | (-)                  |
|      | 19         | N/A        | 0.16 (1/1) | N/A            | N/A                 | N/A                  | N/A                  | N/A                   | 57                               | 0.007                         | 0.99                    | 1.05                   | -                    |
|      | 20         | N/A        | 0 (0/1)    | N/A            | N/A                 | N/A                  | N/A                  | N/A                   | 57                               | 0.009                         | 1.20                    | 1.27                   |                      |
|      | Global     | N/A        | N/A        | N/A            | 0.02 (2/2)          | 0.03 (1/1)           | 0.13 (2/2)           | N/A                   | N/A                              | N/A                           | N/A                     | N/A                    | N/A                  |
| 2018 | 9          | 0.04 (2/3) | 0.02 (3/4) | 0 (0/1)        | 0 (0/1)             | 0 (0/1)              | 0.02 (1/1)           | 0.99 (1/1)            | 42                               | 0.002                         | 8.30                    | 9.25                   | -                    |
|      | 11         | 0 (0/3)    | 0.01 (1/3) | 0.14 (1/1)     | N/A                 | N/A                  | N/A                  | N/A                   | 71                               | 0.004                         | 3.61                    | 3.65                   | -                    |
|      | 16         | 0 (0/1)    | N/A        | N/A            | N/A                 | N/A                  | N/A                  | N/A                   | 28                               | 0.002                         | 0.14                    | 0.93                   | -                    |
|      | Global     | N/A        | N/A        | N/A            | 0 (0/1)             | N/A                  | N/A                  | N/A                   | N/A                              | N/A                           | N/A                     | N/A                    | N/A                  |
| 2019 | 1          | 0.05 (7/7) | 0.02 (3/7) | N/A            | 0 (0/1)             | 0 (0/1)              | 0 (0/1)              | N/A                   | 62                               | 0.017                         | 4.10                    | 4.25                   | (+)                  |
|      | 2          | 0.31 (6/6) | 0.15 (7/7) | N/A            | 0 (0/1)             | 0.08 (1/1)           | 4.51 (1/1)           | 6.24 (1/1)            | 50                               | 2.562                         | 24.22                   | 28.84                  | +                    |
|      | 4          | 0.02 (3/5) | 0.02 (3/6) | 0 (0/1)        | 0 (0/1)             | N/A                  | 0 (0/1)              | N/A                   | 64                               | 0.006                         | 14.26                   | 14.42                  | (+)                  |
|      | 8          | 0 (0/3)    | 0 (0/3)    | 0 (0/3)        | N/A                 | N/A                  | N/A                  | N/A                   | 73                               | 0.012                         | 1.34                    | 1.45                   | -                    |
|      | 9          | 0.01 (1/3) | N/A        | N/A            | 0 (0/1)             | 0.04 (1/1)           | 0 (0/1)              | N/A                   | 20                               | 0.004                         | 0.45                    | 3.13                   | -                    |
|      | 10         | 0 (0/4)    | N/A        | N/A            | 0.02 (1/1)          | N/A                  | 0.04 (1/1)           | N/A                   | 7                                | 0.000                         | 0.00                    | 9.59                   | (-)                  |
|      | 11         | 0.01 (1/4) | N/A        | N/A            | N/A                 | N/A                  | N/A                  | N/A                   | 6                                | 0.000                         | 0.00                    | 8.47                   | -                    |
|      | 12         | 0.03 (4/4) | 0.02 (2/7) | N/A            | N/A                 | N/A                  | N/A                  | N/A                   | 79                               | 0.004                         | 45.40                   | 45.45                  | [-]                  |
|      | 16         | 0 (0/4)    | N/A        | N/A            | 0 (0/1)             | N/A                  | 0 (0/1)              | N/A                   | 20                               | 0.086                         | 0.90                    | 8.82                   | (-)                  |
|      | 17         | 0 (0/4)    | N/A        | N/A            | N/A                 | N/A                  | N/A                  | N/A                   | 20                               | 0.063                         | 0.92                    | 6.63                   | (-)                  |
|      | 18         | 0.01 (2/6) | N/A        | N/A            | N/A                 | N/A                  | N/A                  | N/A                   | 20                               | 0.072                         | 0.83                    | 12.81                  | (-)                  |

646 (+) = active columnaris cases but post peak, (-) = no active cases but infection occurred sometime  
 647 following sampling during production cycle, [-] = no active cases but previous large outbreak had  
 648 occurred, N/A = not applicable due to samples not being collected or being excluded during processing.

649

650

651

652

653



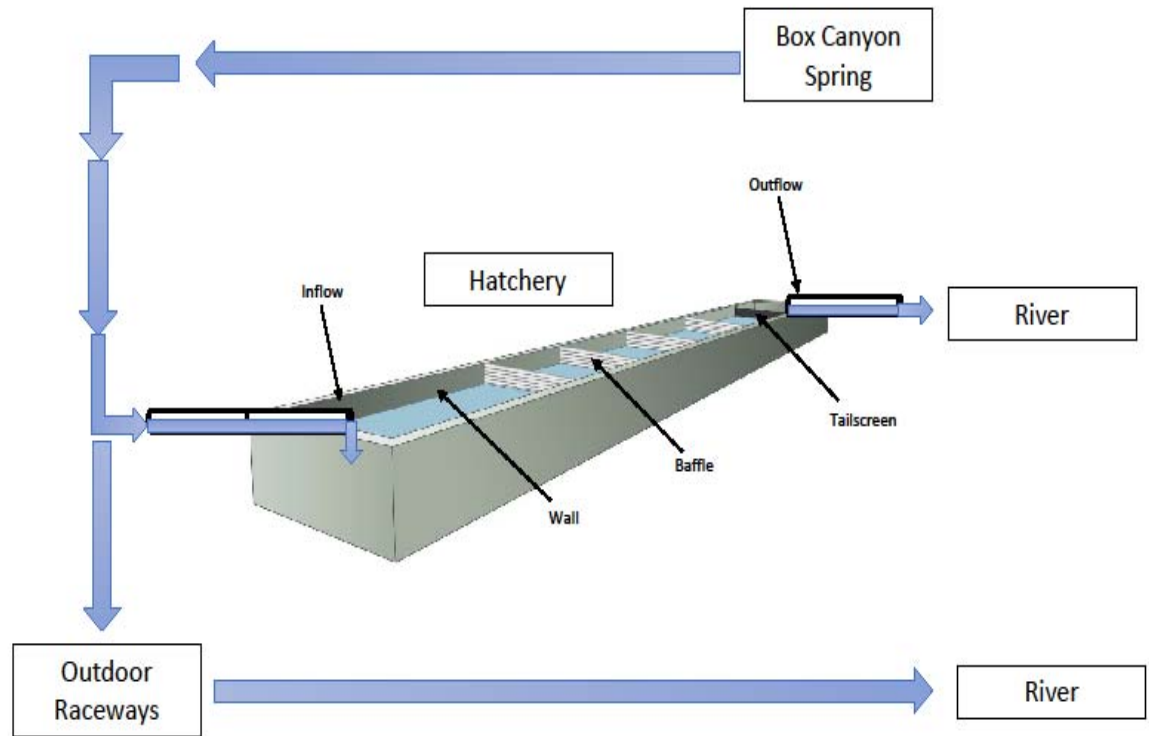

654  
655

656 **Supplementary Figure 1: Diagram of Water Flow Progression and Hatchery Raceway Structure.** Blue  
657 arrows indicate the flow of water starting from the upstream, Box Canyon Spring and proceeding  
658 through the hatchery and outdoor raceways before flowing out into the river. This is a simplified layout  
659 and is only meant to show the basic progression of water as it pertains to this study.

660

661

662

663

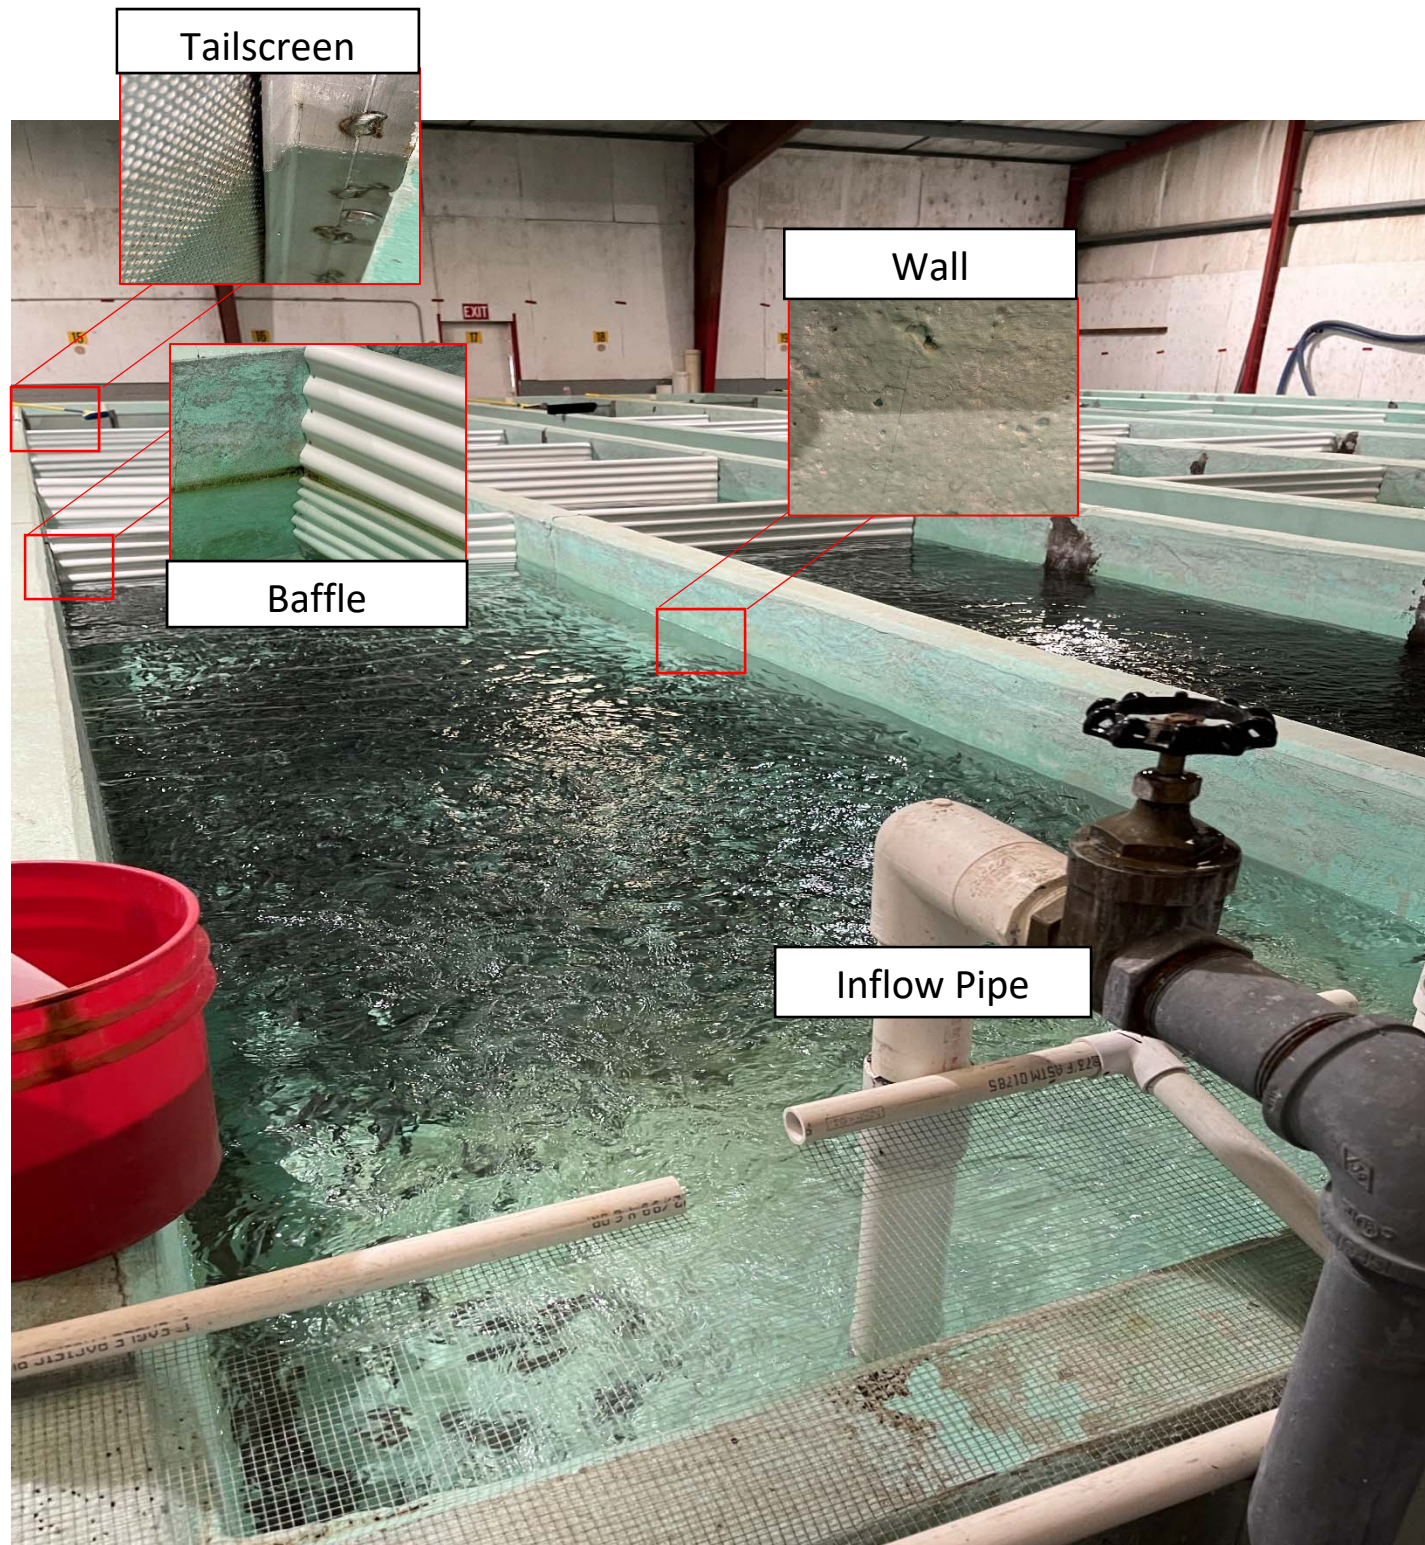

664

665 **Supplementary Figure 2: Raceway Layout and Structures.** The raceway layout is displayed with the  
666 inflowing water pipe and three sampled surface types (wall, baffle, and tailscreen) highlighted. Water  
667 flows away from the inflow pipe towards the end of the raceway, where it flows out through a pipe (not  
668 shown).

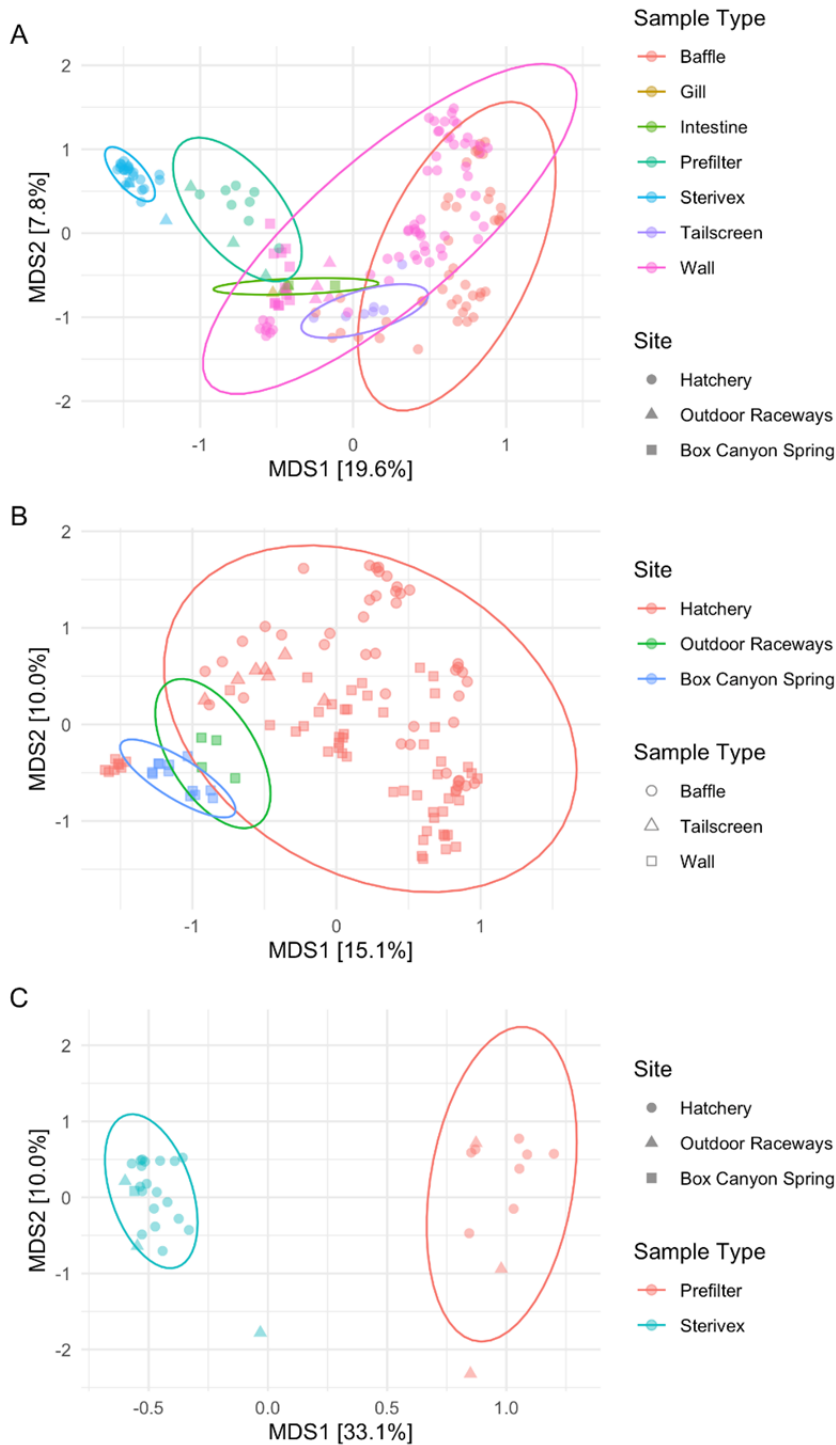

669

670 **Supplementary Figure 3: Bray-Curtis Ordinations of the Three Sampling Sites.** (A) All sample types, (B)  
671 surface samples only, and (C) water samples only from three sampling sites with 95% confidence  
672 ellipses. Three samples or more were required for an ellipse to be drawn for a particular category.  
673 Samples are colored by most significant contributing variables.

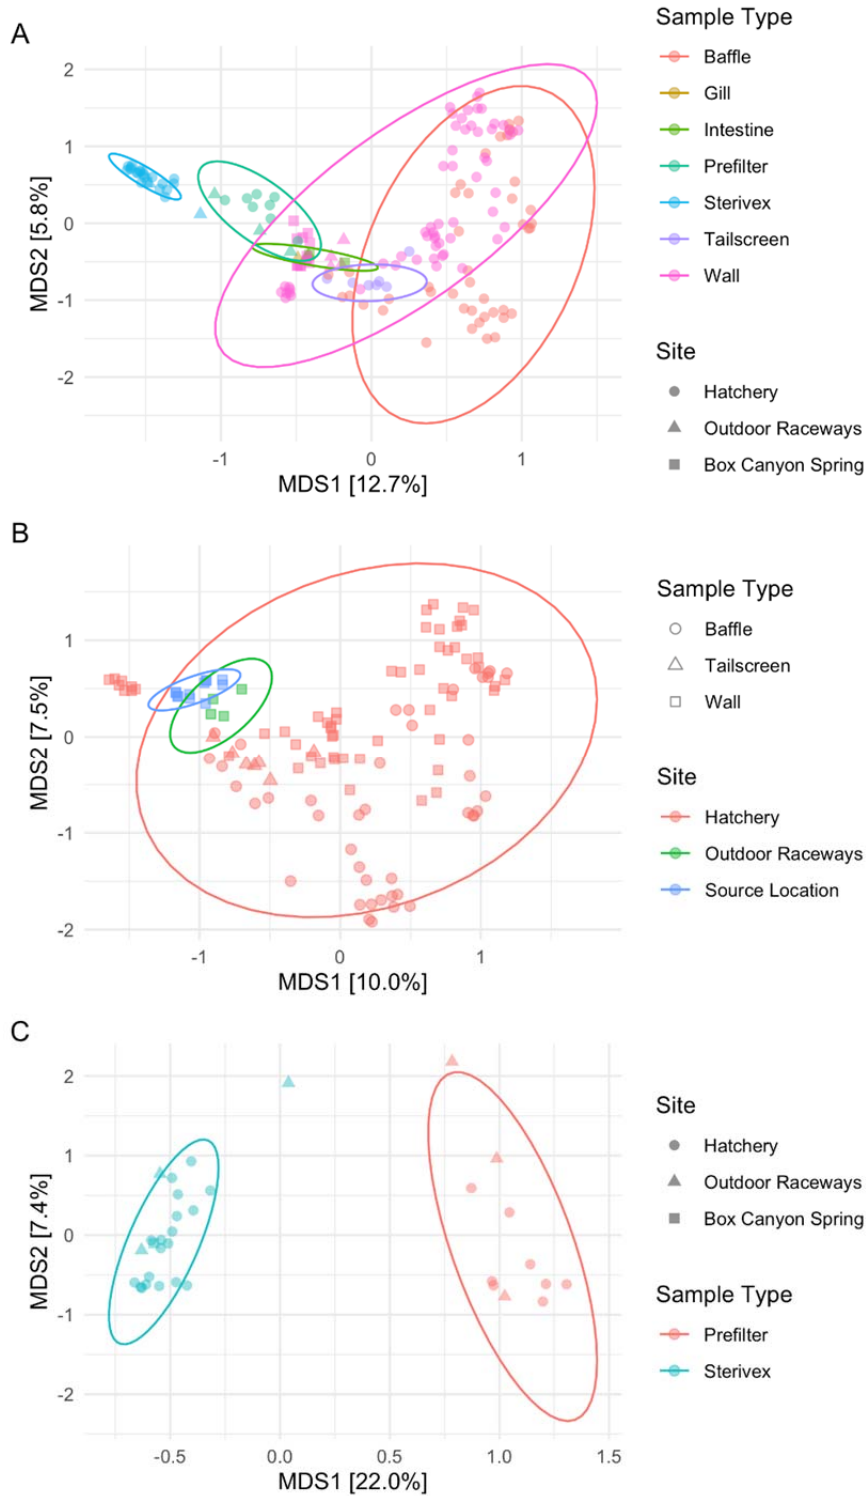

674

675 **Supplementary Figure 4: Jaccard Ordinations of the Three Sampling Sites.** (A) All sample types, (B)  
676 surface samples only, and (C) water samples only from three sampling sites with 95% confidence  
677 ellipses. Three samples or more were required for an ellipse to be drawn for a particular category.  
678 Samples are colored by most significant contributing variables.

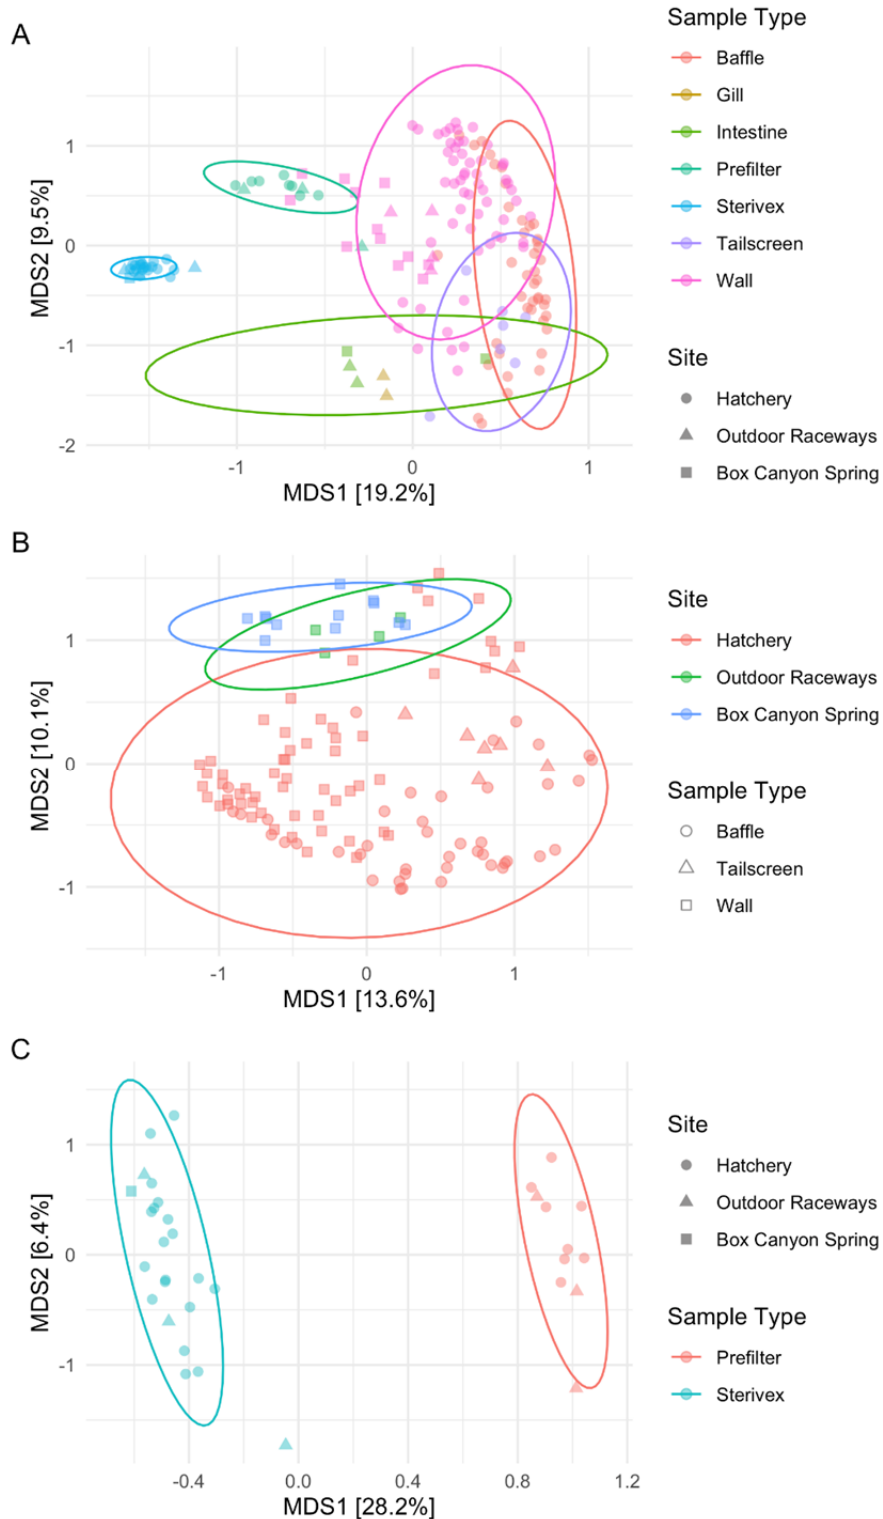

679

680 **Supplementary Figure 5: Unweighted Unifrac Ordinations of the Three Sampling Sites.** (A) All sample  
681 types, (B) surface samples only, and (C) water samples only from three sampling sites with 95%  
682 confidence ellipses. Three samples or more were required for an ellipse to be drawn for a particular  
683 category. Samples are colored by most significant contributing variables.

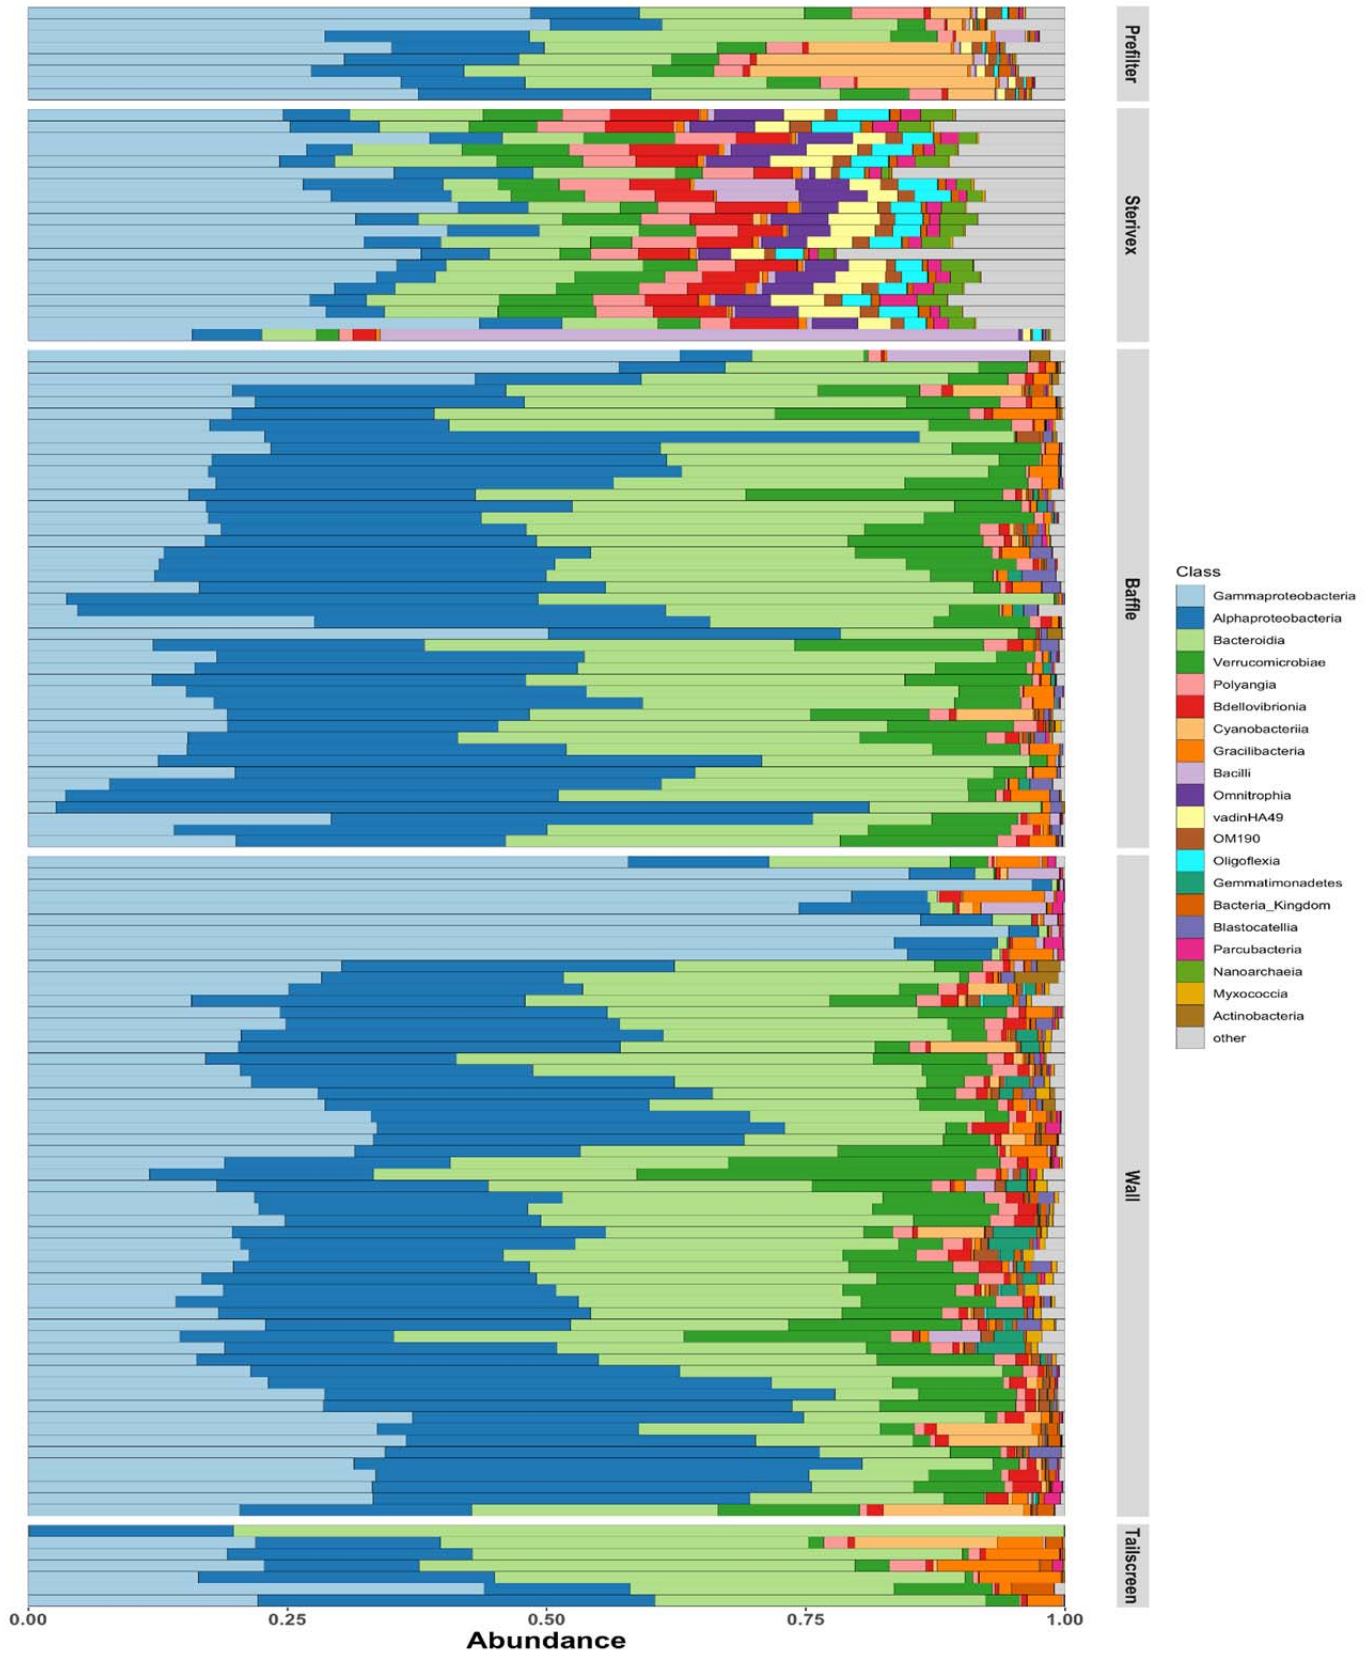

684

685 **Supplementary Figure 6: Class Level Relative Abundance Bar Plots Grouped by Sample Type.**

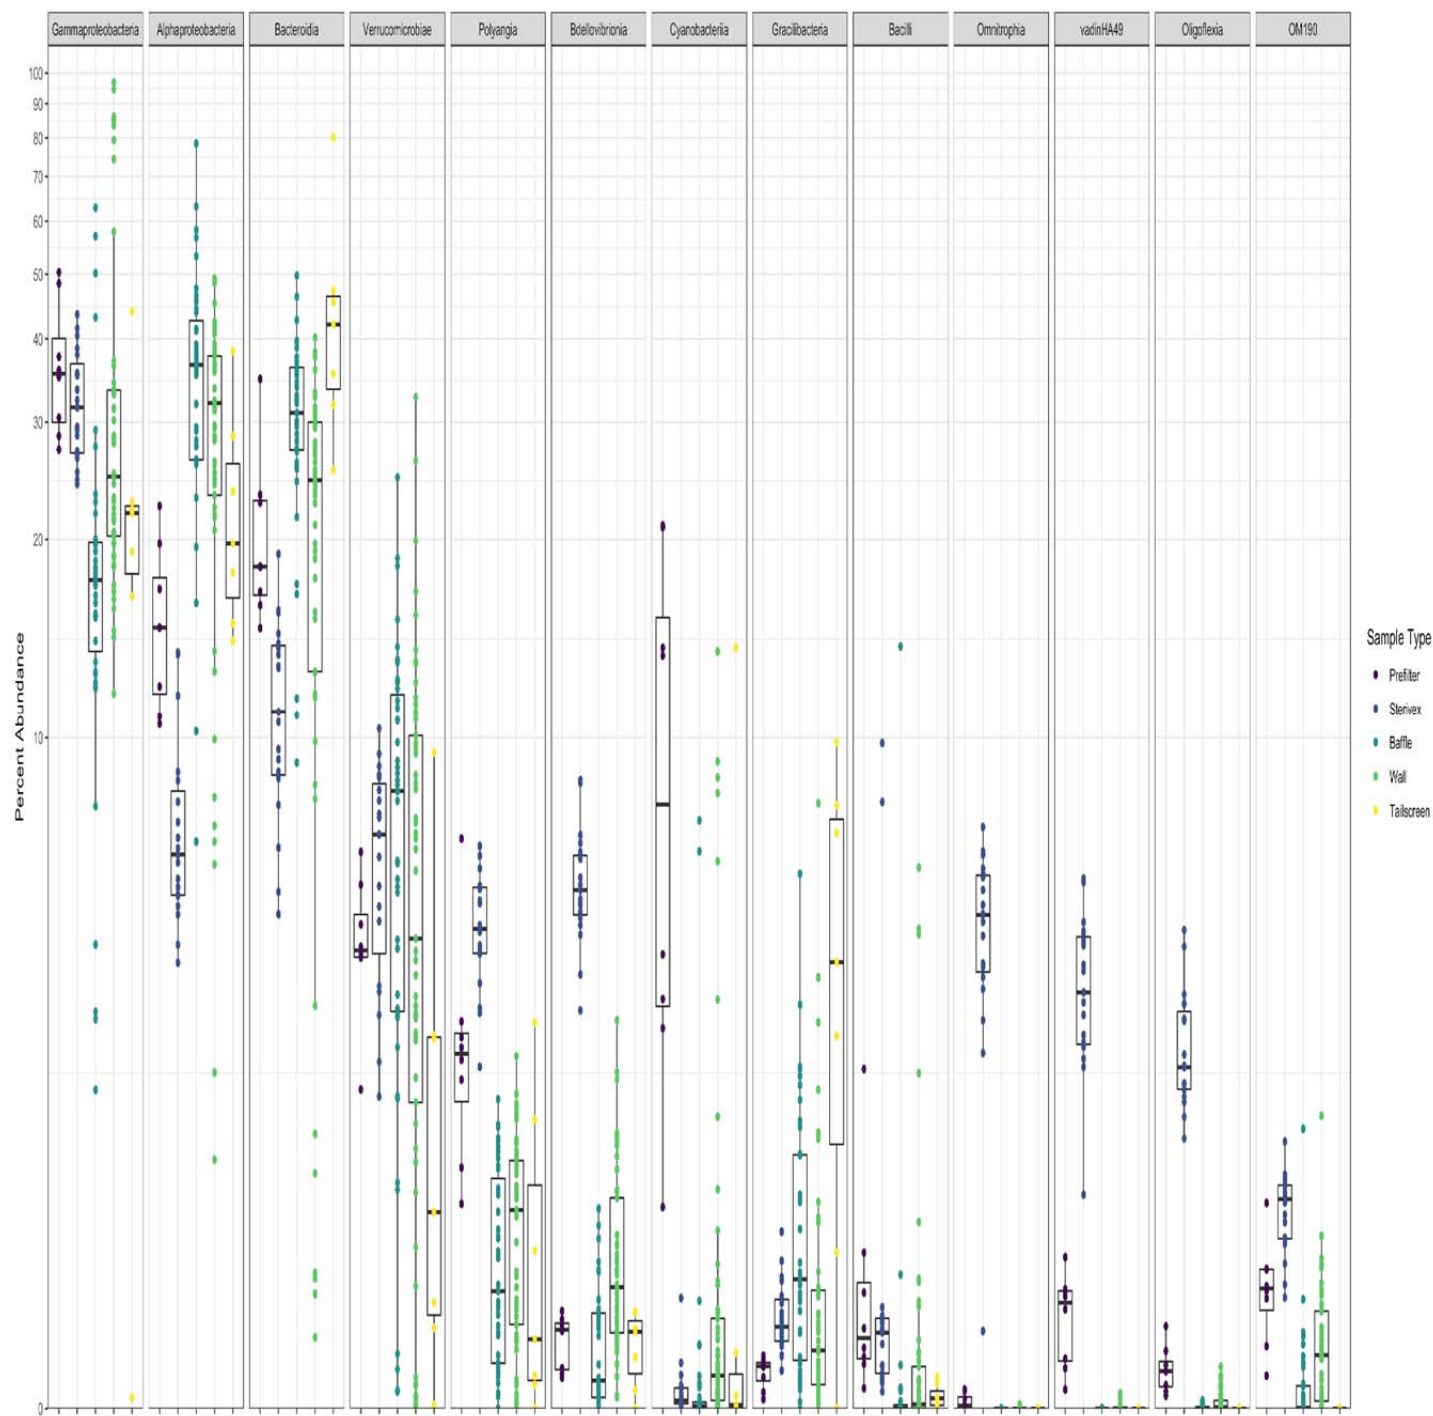

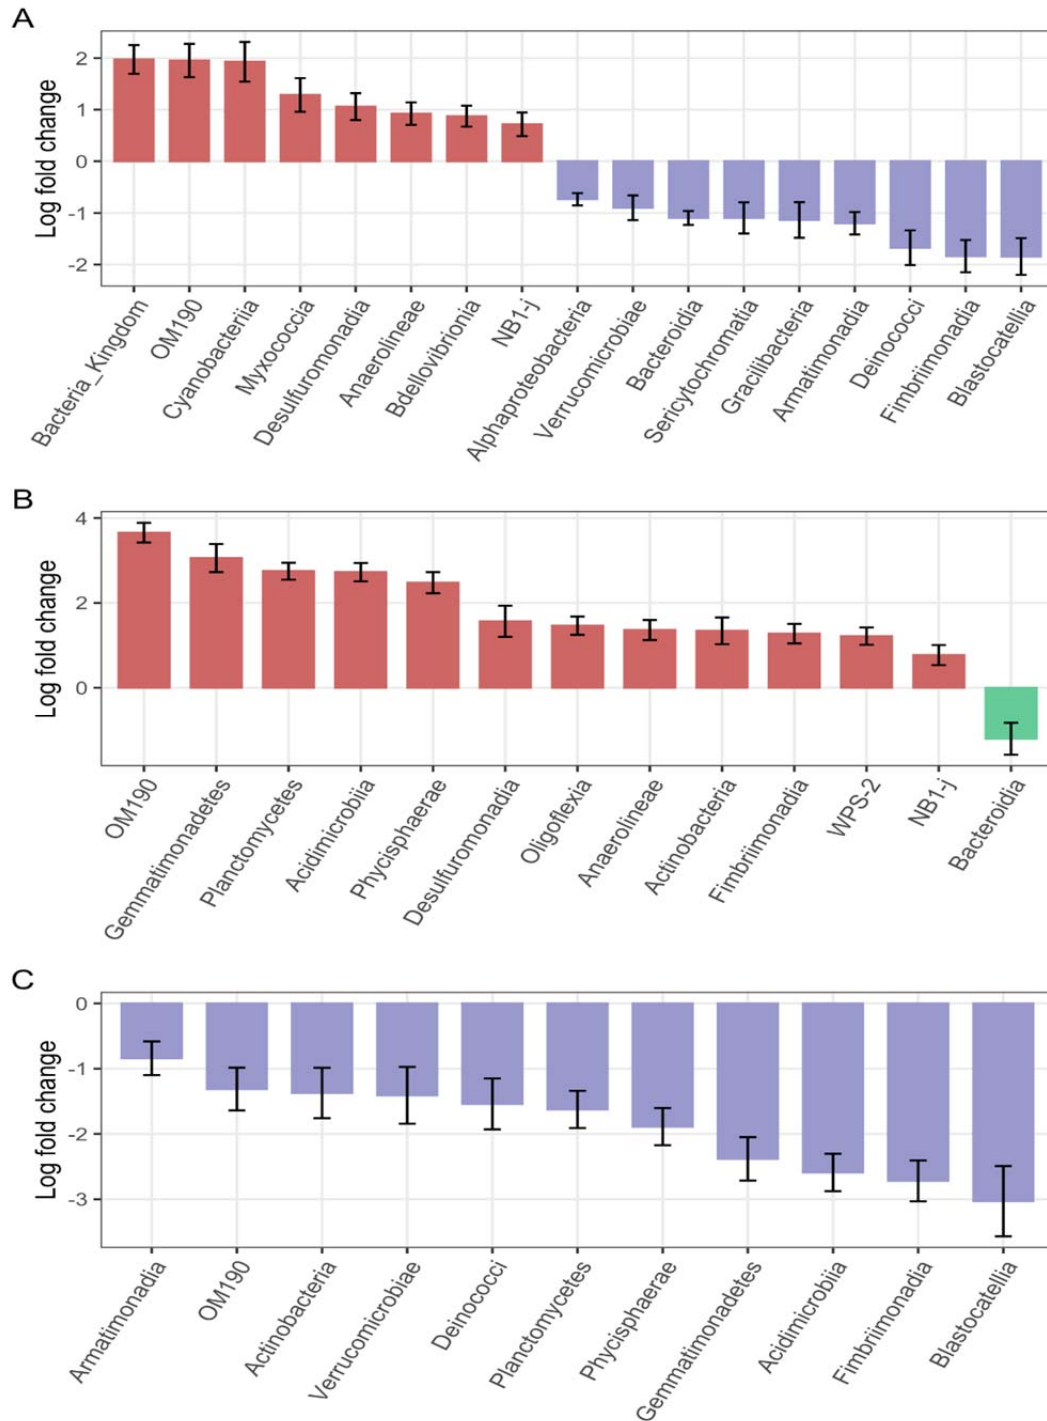

691

692 **Supplementary Figure 8: Waterfall Plots for Hatchery Surfaces.** (A) Wall and baffle swabs, (B) wall and  
 693 tailscreen swabs, and (C) tailscreen and baffle swabs were compared in pairwise fashion using ANCOM-  
 694 BC at the class level. Log<sub>2</sub>-fold differences are plotted from classes found to be significantly different.  
 695 Red bars – elevated in wall swabs, blue bars – elevated in baffle swabs, green bars – elevated in  
 696 tailscreen swabs. Bacteria\_Kingdom indicates reads that were not assigned past the kingdom level.



A

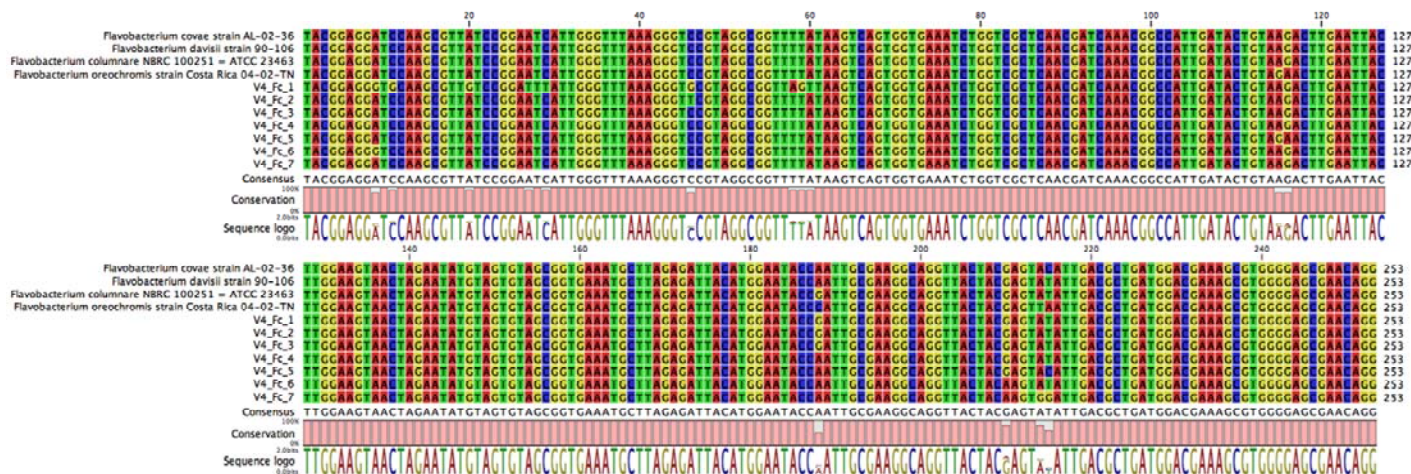

B

|                                                       | 1  | 2  | 3  | 4 | 5  | 6 | 7  | 8  | 9 | 10 | 11 |
|-------------------------------------------------------|----|----|----|---|----|---|----|----|---|----|----|
| Flavobacterium covae strain AL-02-36                  | 1  | 0  | 0  | 0 | 0  | 0 | 0  | 0  | 0 | 0  | 0  |
| Flavobacterium davisii strain 90-106                  | 2  | 1  | 0  | 0 | 0  | 0 | 0  | 0  | 0 | 0  | 0  |
| Flavobacterium columnare NBRC 100251 = ATCC 23463     | 3  | 2  | 1  | 0 | 0  | 0 | 0  | 0  | 0 | 0  | 0  |
| Flavobacterium oreochromis strain Costa Rica 04-02-TN | 4  | 5  | 5  | 5 | 0  | 0 | 0  | 0  | 0 | 0  | 0  |
| V4_Fc_1                                               | 5  | 2  | 1  | 0 | 5  | 0 | 0  | 0  | 0 | 0  | 0  |
| V4_Fc_2                                               | 6  | 3  | 3  | 4 | 6  | 4 | 0  | 0  | 0 | 0  | 0  |
| V4_Fc_3                                               | 7  | 1  | 0  | 1 | 5  | 1 | 3  | 0  | 0 | 0  | 0  |
| V4_Fc_4                                               | 8  | 3  | 2  | 1 | 6  | 1 | 5  | 2  | 0 | 0  | 0  |
| V4_Fc_5                                               | 9  | 3  | 2  | 3 | 7  | 3 | 3  | 2  | 4 | 0  | 0  |
| V4_Fc_6                                               | 10 | 2  | 3  | 4 | 3  | 4 | 5  | 3  | 5 | 5  | 0  |
| V4_Fc_7                                               | 11 | 11 | 10 | 9 | 14 | 9 | 13 | 10 | 9 | 10 | 13 |

697  
698

699 **Supplementary Figure 9: *F. columnare* 16S rRNA V4 Region Gene Sequence Comparison.** 16S rRNA  
700 gene sequences from the four type strains previously comprising the single species *F. columnare* were  
701 compared with the 7 ASVs detected within the hatchery dataset. An alignment (A) and distance matrix  
702 (B) were generated for this comparison. ASVs from the hatchery dataset are in decreasing order by total  
703 read count from 1 to 7.

704

705

706

707

708 **Supplementary Table 1: Summary of Samples**

| Sample Number | BioSample Accession | Site             | Raceway ID     | Year | Sample Type | Final Read Count |
|---------------|---------------------|------------------|----------------|------|-------------|------------------|
| 1             | SAMN27156050        | Hatchery         | 6              | 2017 | Baffle      | 97335            |
| 2             | SAMN27156051        | Hatchery         | 6              | 2017 | Baffle      | 24975            |
| 3             | SAMN27156090        | Hatchery         | 6              | 2017 | Prefilter   | 36639            |
| 4             | SAMN27156117        | Hatchery         | 6              | 2017 | Tailscreen  | 52382            |
| 5             | SAMN27156052        | Hatchery         | 8              | 2017 | Baffle      | 45411            |
| 6             | SAMN27156047        | Hatchery         | 14             | 2017 | Baffle      | 19054            |
| 7             | SAMN27156048        | Hatchery         | 19             | 2017 | Baffle      | 65294            |
| 8             | SAMN27156049        | Hatchery         | 20             | 2017 | Baffle      | 36761            |
| 9             | SAMN27156091        | Hatchery         | Global Inflow  | 2017 | Prefilter   | 80237            |
| 10            | SAMN27156098        | Hatchery         | Global Inflow  | 2017 | Sterivex    | 61951            |
| 11            | SAMN27156101        | Hatchery         | Global Inflow  | 2017 | Sterivex    | 104949           |
| 12            | SAMN27156099        | Hatchery         | Global Outflow | 2017 | Sterivex    | 16695            |
| 13            | SAMN27156100        | Hatchery         | Global Outflow | 2017 | Sterivex    | 17882            |
| 14            | SAMN27156183        | Outdoor Raceways | 11             | 2017 | Intestine   | 52719            |
| 15            | SAMN27156184        | Outdoor Raceways | 11             | 2017 | Intestine   | 10967            |
| 16            | SAMN27156186        | Outdoor Raceways | 11             | 2017 | Prefilter   | 37641            |
| 17            | SAMN27156191        | Outdoor Raceways | 11             | 2017 | Wall        | 35347            |
| 18            | SAMN27156192        | Outdoor Raceways | 11             | 2017 | Wall        | 42876            |
| 19            | SAMN27156182        | Outdoor Raceways | 15             | 2017 | Gill        | 14805            |
| 20            | SAMN27156181        | Outdoor Raceways | 15             | 2017 | Gill        | 17319            |
| 21            | SAMN27156187        | Outdoor Raceways | 15             | 2017 | Prefilter   | 39936            |
| 22            | SAMN27156193        | Outdoor Raceways | 15             | 2017 | Wall        | 18868            |
| 23            | SAMN27156194        | Outdoor Raceways | 15             | 2017 | Wall        | 42581            |

|    |              |                  |                |      |            |        |
|----|--------------|------------------|----------------|------|------------|--------|
| 24 | SAMN27156185 | Outdoor Raceways | Global Inflow  | 2017 | Prefilter  | 41543  |
| 25 | SAMN27156188 | Outdoor Raceways | Global Inflow  | 2017 | Sterivex   | 51162  |
| 26 | SAMN27156189 | Outdoor Raceways | Global Outflow | 2017 | Sterivex   | 17298  |
| 27 | SAMN27156190 | Outdoor Raceways | Global Outflow | 2017 | Sterivex   | 19492  |
| 28 | SAMN27156198 | BCS              | N/A            | 2017 | Wall       | 49281  |
| 29 | SAMN27156199 | BCS              | N/A            | 2017 | Wall       | 46696  |
| 30 | SAMN27156056 | Hatchery         | 9              | 2018 | Baffle     | 100379 |
| 31 | SAMN27156057 | Hatchery         | 9              | 2018 | Baffle     | 53660  |
| 32 | SAMN27156058 | Hatchery         | 9              | 2018 | Baffle     | 121706 |
| 33 | SAMN27156059 | Hatchery         | 9              | 2018 | Baffle     | 35652  |
| 34 | SAMN27156092 | Hatchery         | 9              | 2018 | Prefilter  | 10896  |
| 35 | SAMN27156093 | Hatchery         | 9              | 2018 | Prefilter  | 64545  |
| 36 | SAMN27156103 | Hatchery         | 9              | 2018 | Sterivex   | 114452 |
| 37 | SAMN27156104 | Hatchery         | 9              | 2018 | Sterivex   | 55537  |
| 38 | SAMN27156119 | Hatchery         | 9              | 2018 | Tailscreen | 16367  |
| 39 | SAMN27156128 | Hatchery         | 9              | 2018 | Wall       | 46967  |
| 40 | SAMN27156129 | Hatchery         | 9              | 2018 | Wall       | 47685  |
| 41 | SAMN27156130 | Hatchery         | 9              | 2018 | Wall       | 29580  |
| 42 | SAMN27156053 | Hatchery         | 11             | 2018 | Baffle     | 89277  |
| 43 | SAMN27156054 | Hatchery         | 11             | 2018 | Baffle     | 111266 |
| 44 | SAMN27156055 | Hatchery         | 11             | 2018 | Baffle     | 38021  |
| 45 | SAMN27156118 | Hatchery         | 11             | 2018 | Tailscreen | 12311  |
| 46 | SAMN27156124 | Hatchery         | 11             | 2018 | Wall       | 123608 |
| 47 | SAMN27156125 | Hatchery         | 11             | 2018 | Wall       | 22624  |
| 48 | SAMN27156126 | Hatchery         | 11             | 2018 | Wall       | 17685  |
| 49 | SAMN27156127 | Hatchery         | 16             | 2018 | Wall       | 88742  |
| 50 | SAMN27156102 | Hatchery         | Global Inflow  | 2018 | Sterivex   | 55104  |
| 51 | SAMN27156195 | BCS              | N/A            | 2018 | Intestine  | 22981  |
| 52 | SAMN27156196 | BCS              | N/A            | 2018 | Intestine  | 13416  |
| 53 | SAMN27156197 | BCS              | N/A            | 2018 | Sterivex   | 86709  |
| 54 | SAMN27156200 | BCS              | N/A            | 2018 | Wall       | 56506  |
| 55 | SAMN27156070 | Hatchery         | 1              | 2019 | Baffle     | 49124  |
| 56 | SAMN27156071 | Hatchery         | 1              | 2019 | Baffle     | 20848  |
| 57 | SAMN27156072 | Hatchery         | 1              | 2019 | Baffle     | 32048  |
| 58 | SAMN27156073 | Hatchery         | 1              | 2019 | Baffle     | 47895  |

|    |              |          |   |      |            |       |
|----|--------------|----------|---|------|------------|-------|
| 59 | SAMN27156074 | Hatchery | 1 | 2019 | Baffle     | 45974 |
| 60 | SAMN27156075 | Hatchery | 1 | 2019 | Baffle     | 21094 |
| 61 | SAMN27156076 | Hatchery | 1 | 2019 | Baffle     | 42022 |
| 62 | SAMN27156094 | Hatchery | 1 | 2019 | Prefilter  | 24436 |
| 63 | SAMN27156105 | Hatchery | 1 | 2019 | Sterivex   | 30241 |
| 64 | SAMN27156106 | Hatchery | 1 | 2019 | Sterivex   | 27031 |
| 65 | SAMN27156160 | Hatchery | 1 | 2019 | Wall       | 66874 |
| 66 | SAMN27156161 | Hatchery | 1 | 2019 | Wall       | 27823 |
| 67 | SAMN27156162 | Hatchery | 1 | 2019 | Wall       | 47713 |
| 68 | SAMN27156163 | Hatchery | 1 | 2019 | Wall       | 31361 |
| 69 | SAMN27156164 | Hatchery | 1 | 2019 | Wall       | 40100 |
| 70 | SAMN27156165 | Hatchery | 1 | 2019 | Wall       | 24135 |
| 71 | SAMN27156166 | Hatchery | 1 | 2019 | Wall       | 69859 |
| 72 | SAMN27156083 | Hatchery | 2 | 2019 | Baffle     | 83995 |
| 73 | SAMN27156084 | Hatchery | 2 | 2019 | Baffle     | 34789 |
| 74 | SAMN27156085 | Hatchery | 2 | 2019 | Baffle     | 72400 |
| 75 | SAMN27156086 | Hatchery | 2 | 2019 | Baffle     | 72046 |
| 76 | SAMN27156087 | Hatchery | 2 | 2019 | Baffle     | 23188 |
| 77 | SAMN27156088 | Hatchery | 2 | 2019 | Baffle     | 17014 |
| 78 | SAMN27156089 | Hatchery | 2 | 2019 | Baffle     | 68713 |
| 79 | SAMN27156095 | Hatchery | 2 | 2019 | Prefilter  | 24046 |
| 80 | SAMN27156096 | Hatchery | 2 | 2019 | Prefilter  | 19179 |
| 81 | SAMN27156113 | Hatchery | 2 | 2019 | Sterivex   | 15861 |
| 82 | SAMN27156114 | Hatchery | 2 | 2019 | Sterivex   | 22509 |
| 83 | SAMN27156175 | Hatchery | 2 | 2019 | Wall       | 46866 |
| 84 | SAMN27156176 | Hatchery | 2 | 2019 | Wall       | 80912 |
| 85 | SAMN27156177 | Hatchery | 2 | 2019 | Wall       | 38752 |
| 86 | SAMN27156178 | Hatchery | 2 | 2019 | Wall       | 42984 |
| 87 | SAMN27156179 | Hatchery | 2 | 2019 | Wall       | 24812 |
| 88 | SAMN27156180 | Hatchery | 2 | 2019 | Wall       | 34524 |
| 89 | SAMN27156077 | Hatchery | 4 | 2019 | Baffle     | 52165 |
| 90 | SAMN27156078 | Hatchery | 4 | 2019 | Baffle     | 38246 |
| 91 | SAMN27156079 | Hatchery | 4 | 2019 | Baffle     | 65713 |
| 92 | SAMN27156080 | Hatchery | 4 | 2019 | Baffle     | 41429 |
| 93 | SAMN27156081 | Hatchery | 4 | 2019 | Baffle     | 79989 |
| 94 | SAMN27156082 | Hatchery | 4 | 2019 | Baffle     | 41698 |
| 95 | SAMN27156107 | Hatchery | 4 | 2019 | Sterivex   | 48223 |
| 96 | SAMN27156108 | Hatchery | 4 | 2019 | Sterivex   | 11237 |
| 97 | SAMN27156123 | Hatchery | 4 | 2019 | Tailscreen | 33234 |

|     |              |          |    |      |            |        |
|-----|--------------|----------|----|------|------------|--------|
| 98  | SAMN27156167 | Hatchery | 4  | 2019 | Wall       | 31368  |
| 99  | SAMN27156168 | Hatchery | 4  | 2019 | Wall       | 28743  |
| 100 | SAMN27156169 | Hatchery | 4  | 2019 | Wall       | 44824  |
| 101 | SAMN27156170 | Hatchery | 4  | 2019 | Wall       | 40921  |
| 102 | SAMN27156171 | Hatchery | 4  | 2019 | Wall       | 58156  |
| 103 | SAMN27156060 | Hatchery | 8  | 2019 | Baffle     | 27750  |
| 104 | SAMN27156061 | Hatchery | 8  | 2019 | Baffle     | 10978  |
| 105 | SAMN27156062 | Hatchery | 8  | 2019 | Baffle     | 10720  |
| 106 | SAMN27156120 | Hatchery | 8  | 2019 | Tailscreen | 52232  |
| 107 | SAMN27156121 | Hatchery | 8  | 2019 | Tailscreen | 58755  |
| 108 | SAMN27156122 | Hatchery | 8  | 2019 | Tailscreen | 26943  |
| 109 | SAMN27156131 | Hatchery | 8  | 2019 | Wall       | 44277  |
| 110 | SAMN27156132 | Hatchery | 8  | 2019 | Wall       | 31499  |
| 111 | SAMN27156133 | Hatchery | 8  | 2019 | Wall       | 42472  |
| 112 | SAMN27156097 | Hatchery | 9  | 2019 | Prefilter  | 39325  |
| 113 | SAMN27156115 | Hatchery | 9  | 2019 | Sterivex   | 19687  |
| 114 | SAMN27156116 | Hatchery | 9  | 2019 | Sterivex   | 32062  |
| 115 | SAMN27156172 | Hatchery | 9  | 2019 | Wall       | 54288  |
| 116 | SAMN27156173 | Hatchery | 9  | 2019 | Wall       | 30401  |
| 117 | SAMN27156174 | Hatchery | 9  | 2019 | Wall       | 15257  |
| 118 | SAMN27156109 | Hatchery | 10 | 2019 | Sterivex   | 28559  |
| 119 | SAMN27156110 | Hatchery | 10 | 2019 | Sterivex   | 25746  |
| 120 | SAMN27156134 | Hatchery | 10 | 2019 | Wall       | 30488  |
| 121 | SAMN27156135 | Hatchery | 10 | 2019 | Wall       | 55582  |
| 122 | SAMN27156136 | Hatchery | 10 | 2019 | Wall       | 65335  |
| 123 | SAMN27156137 | Hatchery | 10 | 2019 | Wall       | 83071  |
| 124 | SAMN27156138 | Hatchery | 11 | 2019 | Wall       | 18941  |
| 125 | SAMN27156139 | Hatchery | 11 | 2019 | Wall       | 41404  |
| 126 | SAMN27156140 | Hatchery | 11 | 2019 | Wall       | 40264  |
| 127 | SAMN27156141 | Hatchery | 11 | 2019 | Wall       | 37745  |
| 128 | SAMN27156063 | Hatchery | 12 | 2019 | Baffle     | 38024  |
| 129 | SAMN27156064 | Hatchery | 12 | 2019 | Baffle     | 41947  |
| 130 | SAMN27156065 | Hatchery | 12 | 2019 | Baffle     | 53911  |
| 131 | SAMN27156066 | Hatchery | 12 | 2019 | Baffle     | 47991  |
| 132 | SAMN27156067 | Hatchery | 12 | 2019 | Baffle     | 55628  |
| 133 | SAMN27156068 | Hatchery | 12 | 2019 | Baffle     | 118206 |
| 134 | SAMN27156069 | Hatchery | 12 | 2019 | Baffle     | 80312  |
| 135 | SAMN27156142 | Hatchery | 12 | 2019 | Wall       | 50708  |
| 136 | SAMN27156143 | Hatchery | 12 | 2019 | Wall       | 50835  |

|     |              |          |     |      |          |        |
|-----|--------------|----------|-----|------|----------|--------|
| 137 | SAMN27156144 | Hatchery | 12  | 2019 | Wall     | 172746 |
| 138 | SAMN27156145 | Hatchery | 12  | 2019 | Wall     | 164648 |
| 139 | SAMN27156111 | Hatchery | 16  | 2019 | Sterivex | 26260  |
| 140 | SAMN27156112 | Hatchery | 16  | 2019 | Sterivex | 26428  |
| 141 | SAMN27156146 | Hatchery | 16  | 2019 | Wall     | 30427  |
| 142 | SAMN27156147 | Hatchery | 16  | 2019 | Wall     | 24192  |
| 143 | SAMN27156148 | Hatchery | 16  | 2019 | Wall     | 34118  |
| 144 | SAMN27156149 | Hatchery | 16  | 2019 | Wall     | 21829  |
| 145 | SAMN27156150 | Hatchery | 17  | 2019 | Wall     | 33660  |
| 146 | SAMN27156151 | Hatchery | 17  | 2019 | Wall     | 45161  |
| 147 | SAMN27156152 | Hatchery | 17  | 2019 | Wall     | 16197  |
| 148 | SAMN27156153 | Hatchery | 17  | 2019 | Wall     | 23562  |
| 149 | SAMN27156154 | Hatchery | 18  | 2019 | Wall     | 22460  |
| 150 | SAMN27156155 | Hatchery | 18  | 2019 | Wall     | 50796  |
| 151 | SAMN27156156 | Hatchery | 18  | 2019 | Wall     | 16011  |
| 152 | SAMN27156157 | Hatchery | 18  | 2019 | Wall     | 52423  |
| 153 | SAMN27156158 | Hatchery | 18  | 2019 | Wall     | 31999  |
| 154 | SAMN27156159 | Hatchery | 18  | 2019 | Wall     | 30377  |
| 155 | SAMN27156201 | BCS      | N/A | 2019 | Wall     | 46605  |
| 156 | SAMN27156202 | BCS      | N/A | 2019 | Wall     | 12823  |
| 157 | SAMN27156203 | BCS      | N/A | 2019 | Wall     | 76585  |
| 158 | SAMN27156204 | BCS      | N/A | 2019 | Wall     | 42970  |
| 159 | SAMN27156205 | BCS      | N/A | 2019 | Wall     | 87642  |
| 160 | SAMN27156206 | BCS      | N/A | 2019 | Wall     | 95144  |
| 161 | SAMN27156207 | BCS      | N/A | 2019 | Wall     | 42303  |
| 162 | SAMN27156208 | BCS      | N/A | 2019 | Wall     | 78732  |
| 163 | SAMN27156209 | BCS      | N/A | 2019 | Wall     | 42722  |

709

710

711

712

713

714

715

716

717

718 **Supplementary Table 2: PERMANOVA Testing of Bray-Curtis Distances for Surface and Water Samples**  
 719 **at the Three Sites.**

|                                         | Surfaces |                | Water  |                |
|-----------------------------------------|----------|----------------|--------|----------------|
|                                         | p        | R <sup>2</sup> | p      | R <sup>2</sup> |
| <b>Sample Type</b>                      | 0.0001   | 0.0909         | 0.0001 | 0.3117         |
| <b>Sampling Year</b>                    | 0.0001   | 0.0328         | 0.0186 | 0.0476         |
| <b>Sampling Site</b>                    | 0.0001   | 0.0882         | 0.1408 | 0.0517         |
| <b>Sample Type: Year</b>                | 0.0001   | 0.0351         | 0.1421 | 0.0268         |
| <b>Sampling Site: Year</b> <sup>1</sup> | 0.0001   | 0.0217         |        |                |
| <b>Sample Type: Site</b> <sup>1</sup>   |          |                | 0.3472 | 0.0193         |

720 <sup>1</sup>Due to sample sparsity for specific sites, testing could not be performed on these interactions

721

722 **Supplementary Table 3: PERMANOVA Testing of Jaccard Distances for Surface and Water Samples at**  
 723 **the Three Sites.**

|                                         | Surfaces |                | Water  |                |
|-----------------------------------------|----------|----------------|--------|----------------|
|                                         | p        | R <sup>2</sup> | p      | R <sup>2</sup> |
| <b>Sample Type</b>                      | 0.0001   | 0.0696         | 0.0001 | 0.2062         |
| <b>Sampling Year</b>                    | 0.0001   | 0.0257         | 0.0194 | 0.0452         |
| <b>Sampling Site</b>                    | 0.0001   | 0.0588         | 0.2006 | 0.0534         |
| <b>Sample Type: Year</b>                | 0.0001   | 0.03           | 0.0892 | 0.0323         |
| <b>Sampling Site: Year</b> <sup>1</sup> | 0.0001   | 0.0173         |        |                |
| <b>Sample Type: Site</b> <sup>1</sup>   |          |                | 0.3441 | 0.0235         |

724 <sup>1</sup>Due to sample sparsity for specific sites, testing could not be performed on these interactions

725

726 **Supplementary Table 4: PERMANOVA Testing of Unweighted Unifrac Distances for Surface and Water**  
 727 **Samples at Three Sites.**

|                                         | Surfaces |                | Water  |                |
|-----------------------------------------|----------|----------------|--------|----------------|
|                                         | p        | R <sup>2</sup> | p      | R <sup>2</sup> |
| <b>Sample Type</b>                      | 0.0001   | 0.0894         | 0.0001 | 0.2598         |
| <b>Sampling Year</b>                    | 0.0001   | 0.0232         | 0.2348 | 0.0254         |
| <b>Sampling Site</b>                    | 0.0001   | 0.0723         | 0.3346 | 0.0463         |
| <b>Sample Type: Year</b>                | 0.0002   | 0.0282         | 0.3479 | 0.0221         |
| <b>Sampling Site: Year</b> <sup>1</sup> | 0.0006   | 0.0163         |        |                |
| <b>Sample Type: Site</b> <sup>1</sup>   |          |                | 0.3877 | 0.0214         |

728 <sup>1</sup>Due to sample sparsity for specific sites, testing could not be performed on these interactions

729

730

731 **Supplementary Table 5: Significant Class-Level ANCOM Results Between Sampling Sites.**

| <b>Hatchery vs. Outdoor Raceways</b> |          |                |
|--------------------------------------|----------|----------------|
| <b>Class</b>                         | <b>W</b> | <b>q-value</b> |
| Alphaproteobacteria                  | 5.06     | 1.67E-05       |
| OM190                                | 3.81     | 5.29E-03       |
| Myxococcia                           | 3.79     | 5.58E-03       |
| Vampirivibrionia                     | -5.76    | 3.36E-07       |
| Armatimonadia                        | -5.83    | 2.27E-07       |
| Bacteria_Kingdom                     | -5.83    | 2.27E-07       |
| Sericytochromatia                    | -7.70    | 6.06E-13       |
| Chlamydiae                           | -10.86   | 8.04E-26       |
| Deinococci                           | -16.61   | 2.72E-60       |
| Cyanobacteriia                       | -22.49   | 2.32E-110      |
|                                      |          |                |
| <b>BCS vs. Hatchery</b>              |          |                |
| <b>Class</b>                         | <b>W</b> | <b>q-value</b> |
| Cyanobacteriia                       | 14.58    | 1.80E-46       |
| Kapabacteria                         | 5.71     | 4.76E-07       |
| Oligoflexia                          | 4.53     | 2.17E-04       |
| Deinococci                           | 3.51     | 1.40E-02       |
| Intramacronucleata                   | -3.16    | 4.64E-02       |
| Gemmatimonadetes                     | -3.32    | 2.73E-02       |
| Phycisphaerae                        | -3.77    | 5.18E-03       |
| Gracilibacteria                      | -4.01    | 2.00E-03       |
| Campylobacteria                      | -4.21    | 8.56E-04       |
| OM190                                | -4.25    | 7.49E-04       |
| Omnitrophia                          | -4.59    | 1.60E-04       |
| Firmicutes_Phylum                    | -4.75    | 7.69E-05       |
| Bacteroidia                          | -4.91    | 3.60E-05       |
| Fusobacteriia                        | -4.96    | 2.89E-05       |
| Blastocatellia                       | -5.29    | 4.98E-06       |
| Bdellovibrionia                      | -6.09    | 4.78E-08       |
| Polyangia                            | -6.85    | 3.22E-10       |
| WPS-2                                | -7.38    | 7.20E-12       |
| Myxococcia                           | -8.13    | 2.03E-14       |
| Gammaproteobacteria                  | -8.39    | 2.33E-15       |
| Alphaproteobacteria                  | -9.61    | 3.63E-20       |
|                                      |          |                |
| <b>Outdoor Raceways vs. BCS</b>      |          |                |
| <b>Class</b>                         | <b>W</b> | <b>q-value</b> |
| Oligoflexia                          | 5.40     | 3.28E-06       |
| Vicinamibacteria                     | 4.95     | 3.55E-05       |
| Cyanobacteriia                       | 4.18     | 1.38E-03       |
| vadinHA49                            | 3.86     | 5.26E-03       |
| Actinobacteria                       | 3.28     | 4.71E-02       |

732 Positive W values indicate higher levels of the corresponding class in the first mentioned site group and  
 733 negative W values indicate higher levels in the second mentioned site group within the comparison.

734



735 **Supplementary Table 6: PERMANOVA Testing Results of Sample Type Variable within Hatchery**  
 736 **Samples for All Methods.**

|                           | <b>p</b> | <b>R<sup>2</sup></b> |
|---------------------------|----------|----------------------|
| <b>Weighted Unifrac</b>   | 0.0001   | 0.398                |
| <b>Unweighted Unifrac</b> | 0.0001   | 0.317                |
| <b>Bray-Curtis</b>        | 0.0001   | 0.31                 |
| <b>Jaccard</b>            | 0.0001   | 0.214                |

737

738 **Supplementary Table 7: Pairwise Wilcoxon Signed-Rank Test Statistics for Shannon Index Diversity by**  
 739 **Sample Type.**

| <b>group1</b> | <b>group2</b> | <b>n1</b> | <b>n2</b> | <b>statistic</b> | <b>p</b> | <b>p.adj</b> | <b>p.adj.signif</b> |
|---------------|---------------|-----------|-----------|------------------|----------|--------------|---------------------|
| Baffle        | Prefilter     | 43        | 8         | 0                | 3.14E-09 | 2.51E-08     | ****                |
| Baffle        | Sterivex      | 43        | 19        | 0                | 4.67E-16 | 4.67E-15     | ****                |
| Baffle        | Tailscreen    | 43        | 7         | 260              | 0.001    | 0.002        | **                  |
| Baffle        | Wall          | 43        | 57        | 714              | 0.000374 | 0.002        | **                  |
| Prefilter     | Sterivex      | 8         | 19        | 25               | 0.005    | 0.005        | **                  |
| Prefilter     | Tailscreen    | 8         | 7         | 56               | 0.000311 | 0.002        | **                  |
| Prefilter     | Wall          | 8         | 57        | 452              | 8.09E-06 | 4.85E-05     | ****                |
| Sterivex      | Tailscreen    | 19        | 7         | 133              | 3.04E-06 | 2.13E-05     | ****                |
| Sterivex      | Wall          | 19        | 57        | 1083             | 8.60E-11 | 7.74E-10     | ****                |
| Tailscreen    | Wall          | 7         | 57        | 39               | 0.000578 | 0.002        | **                  |

740

741 **Supplementary Table 8: Pairwise Wilcoxon Signed-Rank Test Statistics for Faith's Phylogenetic**  
 742 **Diversity by Sample Type.**

| <b>group1</b> | <b>group2</b> | <b>n1</b> | <b>n2</b> | <b>statistic</b> | <b>p</b> | <b>p.adj</b> | <b>p.adj.signif</b> |
|---------------|---------------|-----------|-----------|------------------|----------|--------------|---------------------|
| Baffle        | Prefilter     | 43        | 8         | 1                | 6.28E-09 | 5.02E-08     | ****                |
| Baffle        | Sterivex      | 43        | 19        | 0                | 4.67E-16 | 4.67E-15     | ****                |
| Baffle        | Tailscreen    | 43        | 7         | 219              | 0.056    | 0.059        | ns                  |
| Baffle        | Wall          | 43        | 57        | 534              | 1.50E-06 | 1.05E-05     | ****                |
| Prefilter     | Sterivex      | 8         | 19        | 35               | 0.029    | 0.059        | ns                  |
| Prefilter     | Tailscreen    | 8         | 7         | 56               | 0.000311 | 0.000933     | ***                 |
| Prefilter     | Wall          | 8         | 57        | 454              | 6.71E-06 | 3.36E-05     | ****                |
| Sterivex      | Tailscreen    | 19        | 7         | 133              | 3.04E-06 | 1.82E-05     | ****                |
| Sterivex      | Wall          | 19        | 57        | 1083             | 8.60E-11 | 7.74E-10     | ****                |
| Tailscreen    | Wall          | 7         | 57        | 27               | 0.000216 | 0.000864     | ***                 |

743

744

745 **Supplementary Table 9: *F. columnare*-positive Samples.**

| Sample Number | BioSample Accession | Sampling Location       | Sample Type | Sampling Year | <i>F. columnare</i> Reads | <i>F. columnare</i> Relative Abundance | Days from First Feed at Sampling | Daily % Mortality at Sampling | Mortality % at Sampling | Cumulative % Mortality | Columnaris Diagnosed |
|---------------|---------------------|-------------------------|-------------|---------------|---------------------------|----------------------------------------|----------------------------------|-------------------------------|-------------------------|------------------------|----------------------|
| 3             | SAMN27156090        | Raceway #6 Outflow      | Prefilter   | 2017          | 474                       | 1.29                                   | 71                               | 0.017                         | 1.93                    | 1.97                   | -                    |
| 4             | SAMN27156117        | Raceway #6              | Tailscreen  | 2017          | 31                        | 0.06                                   | 71                               | 0.017                         | 1.93                    | 1.97                   | -                    |
| 7             | SAMN27156048        | Raceway #19             | Baffle      | 2017          | 106                       | 0.16                                   | 57                               | 0.007                         | 0.99                    | 1.05                   | -                    |
| 9             | SAMN27156091        | Global Hatchery Inflow  | Prefilter   | 2017          | 25                        | 0.03                                   | N/A                              | N/A                           | N/A                     | N/A                    | N/A                  |
| 10            | SAMN27156098        | Global Hatchery Inflow  | Sterivex    | 2017          | 10                        | 0.02                                   | N/A                              | N/A                           | N/A                     | N/A                    | N/A                  |
| 11            | SAMN27156101        | Global Hatchery Inflow  | Sterivex    | 2017          | 15                        | 0.01                                   | N/A                              | N/A                           | N/A                     | N/A                    | N/A                  |
| 12            | SAMN27156099        | Global Hatchery Outflow | Sterivex    | 2017          | 19                        | 0.11                                   | N/A                              | N/A                           | N/A                     | N/A                    | N/A                  |
| 13            | SAMN27156100        | Global Hatchery Outflow | Sterivex    | 2017          | 25                        | 0.14                                   | N/A                              | N/A                           | N/A                     | N/A                    | N/A                  |
| 30            | SAMN27156056        | Raceway #9              | Baffle      | 2018          | 16                        | 0.02                                   | 42                               | 0.002                         | 8.30                    | 9.25                   | -                    |
| 31            | SAMN27156057        | Raceway #9              | Baffle      | 2018          | 8                         | 0.01                                   | 42                               | 0.002                         | 8.30                    | 9.25                   | -                    |
| 32            | SAMN27156058        | Raceway #9              | Baffle      | 2018          | 35                        | 0.03                                   | 42                               | 0.002                         | 8.30                    | 9.25                   | -                    |
| 35            | SAMN27156093        | Raceway #9 Outflow      | Prefilter   | 2018          | 638                       | 0.99                                   | 42                               | 0.002                         | 8.30                    | 9.25                   | -                    |
| 37            | SAMN27156104        | Raceway #9 Outflow      | Sterivex    | 2018          | 13                        | 0.02                                   | 42                               | 0.002                         | 8.30                    | 9.25                   | -                    |
| 40            | SAMN27156129        | Raceway #9              | Wall        | 2018          | 18                        | 0.04                                   | 42                               | 0.002                         | 8.30                    | 9.25                   | -                    |
| 41            | SAMN27156130        | Raceway #9              | Wall        | 2018          | 22                        | 0.07                                   | 42                               | 0.002                         | 8.30                    | 9.25                   | -                    |
| 44            | SAMN27156055        | Raceway #11             | Baffle      | 2018          | 7                         | 0.02                                   | 71                               | 0.004                         | 3.61                    | 3.65                   | -                    |
| 45            | SAMN27156118        | Raceway #11             | Tailscreen  | 2018          | 17                        | 0.14                                   | 71                               | 0.004                         | 3.61                    | 3.65                   | -                    |
| 55            | SAMN27156070        | Raceway #1              | Baffle      | 2019          | 11                        | 0.02                                   | 62                               | 0.017                         | 4.10                    | 4.25                   | (+)                  |
| 59            | SAMN27156074        | Raceway #1              | Baffle      | 2019          | 10                        | 0.02                                   | 62                               | 0.017                         | 4.10                    | 4.25                   | (+)                  |
| 61            | SAMN27156076        | Raceway #1              | Baffle      | 2019          | 30                        | 0.07                                   | 62                               | 0.017                         | 4.10                    | 4.25                   | (+)                  |
| 65            | SAMN27156160        | Raceway #1              | Wall        | 2019          | 16                        | 0.02                                   | 62                               | 0.017                         | 4.10                    | 4.25                   | (+)                  |
| 66            | SAMN27156161        | Raceway #1              | Wall        | 2019          | 13                        | 0.05                                   | 62                               | 0.017                         | 4.10                    | 4.25                   | (+)                  |
| 67            | SAMN27156162        | Raceway #1              | Wall        | 2019          | 20                        | 0.04                                   | 62                               | 0.017                         | 4.10                    | 4.25                   | (+)                  |
| 68            | SAMN27156163        | Raceway #1              | Wall        | 2019          | 19                        | 0.06                                   | 62                               | 0.017                         | 4.10                    | 4.25                   | (+)                  |
| 69            | SAMN27156164        | Raceway #1              | Wall        | 2019          | 9                         | 0.02                                   | 62                               | 0.017                         | 4.10                    | 4.25                   | (+)                  |
| 70            | SAMN27156165        | Raceway #1              | Wall        | 2019          | 17                        | 0.07                                   | 62                               | 0.017                         | 4.10                    | 4.25                   | (+)                  |
| 71            | SAMN27156166        | Raceway #1              | Wall        | 2019          | 49                        | 0.07                                   | 62                               | 0.017                         | 4.10                    | 4.25                   | (+)                  |
| 72            | SAMN27156083        | Raceway #2              | Baffle      | 2019          | 43                        | 0.05                                   | 50                               | 2.562                         | 24.22                   | 28.84                  | +                    |
| 73            | SAMN27156084        | Raceway #2              | Baffle      | 2019          | 62                        | 0.18                                   | 50                               | 2.562                         | 24.22                   | 28.84                  | +                    |

|     |              |                     |           |      |      |      |    |       |       |       |     |
|-----|--------------|---------------------|-----------|------|------|------|----|-------|-------|-------|-----|
| 74  | SAMN27156085 | Raceway #2          | Baffle    | 2019 | 40   | 0.06 | 50 | 2.562 | 24.22 | 28.84 | +   |
| 75  | SAMN27156086 | Raceway #2          | Baffle    | 2019 | 110  | 0.15 | 50 | 2.562 | 24.22 | 28.84 | +   |
| 76  | SAMN27156087 | Raceway #2          | Baffle    | 2019 | 70   | 0.30 | 50 | 2.562 | 24.22 | 28.84 | +   |
| 77  | SAMN27156088 | Raceway #2          | Baffle    | 2019 | 27   | 0.16 | 50 | 2.562 | 24.22 | 28.84 | +   |
| 78  | SAMN27156089 | Raceway #2          | Baffle    | 2019 | 91   | 0.13 | 50 | 2.562 | 24.22 | 28.84 | +   |
| 79  | SAMN27156095 | Raceway #2 Inflow   | Prefilter | 2019 | 20   | 0.08 | 50 | 2.562 | 24.22 | 28.84 | +   |
| 80  | SAMN27156096 | Raceway #2 Outflow  | Prefilter | 2019 | 1196 | 6.24 | 50 | 2.562 | 24.22 | 28.84 | +   |
| 82  | SAMN27156114 | Raceway #2 Outflow  | Sterivex  | 2019 | 1016 | 4.51 | 50 | 2.562 | 24.22 | 28.84 | +   |
| 83  | SAMN27156175 | Raceway #2          | Wall      | 2019 | 20   | 0.04 | 50 | 2.562 | 24.22 | 28.84 | +   |
| 84  | SAMN27156176 | Raceway #2          | Wall      | 2019 | 181  | 0.22 | 50 | 2.562 | 24.22 | 28.84 | +   |
| 85  | SAMN27156177 | Raceway #2          | Wall      | 2019 | 92   | 0.24 | 50 | 2.562 | 24.22 | 28.84 | +   |
| 86  | SAMN27156178 | Raceway #2          | Wall      | 2019 | 51   | 0.12 | 50 | 2.562 | 24.22 | 28.84 | +   |
| 87  | SAMN27156179 | Raceway #2          | Wall      | 2019 | 198  | 0.80 | 50 | 2.562 | 24.22 | 28.84 | +   |
| 88  | SAMN27156180 | Raceway #2          | Wall      | 2019 | 145  | 0.42 | 50 | 2.562 | 24.22 | 28.84 | +   |
| 89  | SAMN27156077 | Raceway #4          | Baffle    | 2019 | 10   | 0.02 | 64 | 0.006 | 14.26 | 14.42 | (+) |
| 91  | SAMN27156079 | Raceway #4          | Baffle    | 2019 | 13   | 0.02 | 64 | 0.006 | 14.26 | 14.42 | (+) |
| 93  | SAMN27156081 | Raceway #4          | Baffle    | 2019 | 41   | 0.05 | 64 | 0.006 | 14.26 | 14.42 | (+) |
| 98  | SAMN27156167 | Raceway #4          | Wall      | 2019 | 13   | 0.04 | 64 | 0.006 | 14.26 | 14.42 | (+) |
| 100 | SAMN27156169 | Raceway #4          | Wall      | 2019 | 16   | 0.04 | 64 | 0.006 | 14.26 | 14.42 | (+) |
| 102 | SAMN27156171 | Raceway #4          | Wall      | 2019 | 13   | 0.02 | 64 | 0.006 | 14.26 | 14.42 | (+) |
| 112 | SAMN27156097 | Raceway #9 Inflow   | Prefilter | 2019 | 15   | 0.04 | 20 | 0.004 | 0.45  | 3.13  | -   |
| 115 | SAMN27156172 | Raceway #9          | Wall      | 2019 | 14   | 0.03 | 20 | 0.004 | 0.45  | 3.13  | -   |
| 118 | SAMN27156109 | Raceway #10 Inflow  | Sterivex  | 2019 | 5    | 0.02 | 7  | 0     | 0.00  | 9.59  | (-) |
| 119 | SAMN27156110 | Raceway #10 Outflow | Sterivex  | 2019 | 11   | 0.04 | 7  | 0     | 0.00  | 9.59  | (-) |
| 126 | SAMN27156140 | Raceway #11         | Wall      | 2019 | 10   | 0.02 | 6  | 0     | 0.00  | 8.47  | -   |
| 132 | SAMN27156067 | Raceway #12         | Baffle    | 2019 | 13   | 0.02 | 79 | 0.004 | 45.40 | 45.45 | [-] |
| 134 | SAMN27156069 | Raceway #12         | Baffle    | 2019 | 8    | 0.01 | 79 | 0.004 | 45.40 | 45.45 | [-] |
| 135 | SAMN27156142 | Raceway #12         | Wall      | 2019 | 15   | 0.03 | 79 | 0.004 | 45.40 | 45.45 | [-] |
| 136 | SAMN27156143 | Raceway #12         | Wall      | 2019 | 13   | 0.03 | 79 | 0.004 | 45.40 | 45.45 | [-] |
| 137 | SAMN27156144 | Raceway #12         | Wall      | 2019 | 28   | 0.02 | 79 | 0.004 | 45.40 | 45.45 | [-] |
| 138 | SAMN27156145 | Raceway #12         | Wall      | 2019 | 26   | 0.02 | 79 | 0.004 | 45.40 | 45.45 | [-] |
| 152 | SAMN27156157 | Raceway #18         | Wall      | 2019 | 11   | 0.02 | 20 | 0.072 | 0.83  | 12.81 | (-) |
| 154 | SAMN27156159 | Raceway #18         | Wall      | 2019 | 9    | 0.03 | 20 | 0.072 | 0.83  | 12.81 | (-) |

- 746 (+) = active columnaris cases but post peak, (-) = no active cases but infection occurred sometime  
747 following sampling during production cycle, [-] = no active cases but previous large outbreak had  
748 occurred, N/A = not applicable.
- 749
- 750 1. Stentiford GD, Sritunyalucksana K, Flegel TW, Williams BAP, Withyachumnarnkul B,  
751 Itsathitphaisarn O, Bass D. 2017. New Paradigms to Help Solve the Global Aquaculture Disease  
752 Crisis. *PLOS Pathogens* 13:e1006160.
  - 753 2. Legrand TPRA, Wynne JW, Weyrich LS, Oxley APA. 2020. A microbial sea of possibilities: current  
754 knowledge and prospects for an improved understanding of the fish microbiome. *Reviews in*  
755 *Aquaculture* 12:1101–1134.
  - 756 3. Parata L, Sammut J, Egan S. 2021. Opportunities for microbiome research to enhance farmed  
757 freshwater fish quality and production. *Reviews in Aquaculture* 13:2027–2037.
  - 758 4. Romero J, Birkbeck TH, Hassenrück C, Roalkvam I, Drønen K, Dahle H, Wergeland HI. 2019.  
759 Microbial Communities in a Flow-Through Fish Farm for Lumpfish (*Cyclopterus lumpus* L.) During  
760 Healthy Rearing Conditions <https://doi.org/10.3389/fmicb.2019.01594>.
  - 761 5. Watts JEM, Schreier HJ, Lanska L, Hale MS. 2017. The rising tide of antimicrobial resistance in  
762 aquaculture: Sources, sinks and solutions. *Marine Drugs*. MDPI AG  
763 <https://doi.org/10.3390/md15060158>.
  - 764 6. Ríos-Castillo AG, Thompson KD, Adams A, Marín de Mateo M, Rodríguez-Jerez JJ. 2018. Biofilm  
765 formation of *Flavobacterium psychrophilum* on various substrates. *Aquaculture Research*  
766 49:3830–3837.
  - 767 7. Cai W, Arias CR. 2017. Biofilm formation on aquaculture substrates by selected bacterial fish  
768 pathogens. *Journal of Aquatic Animal Health* 29:95–104.
  - 769 8. Fornshell G, Hinshaw J, Tidwell JH. 2012. Flow-through Raceways, p. 173–190. *In* *Aquaculture*  
770 *Production Systems*. Wiley.
  - 771 9. What is a hatchery and why is it important? | NOAA Fisheries.  
772 <https://www.fisheries.noaa.gov/node/52171>. Retrieved 6 January 2020.
  - 773 10. Yanong RPE. 2011. Use of Vaccines in Finfish Aquaculture 1.
  - 774 11. Declercq AM, Haesebrouck F, van den Broeck W, Bossier P, Decostere A. 2013. Columnaris  
775 disease in fish: a review with emphasis on bacterium-host interactions. *Veterinary Research*  
776 44:27.
  - 777 12. LaFrentz BR, Králová S, Burbick CR, Alexander TL, Phillips CW, Griffin MJ, Waldbieser GC, García  
778 JC, de Alexandre Sebastião F, Soto E, Loch TP, Liles MR, Snekvik KR. 2022. The fish pathogen  
779 *Flavobacterium columnare* represents four distinct species: *Flavobacterium columnare*,  
780 *Flavobacterium covae* sp. nov., *Flavobacterium davisii* sp. nov. and *Flavobacterium oreochromis*  
781 sp. nov., and emended description of *Flavobacterium columnare*. *Systematic and Applied*  
782 *Microbiology* 45:126293.

- 783 13. Starliper CE. 2011. Bacterial coldwater disease of fishes caused by *Flavobacterium*  
784 *psychrophilum*. *Journal of Advanced Research* 2:97–108.
- 785 14. Mohammed H, Olivares-Fuster O, LaFrentz S, Arias CR. 2013. New attenuated vaccine against  
786 columnaris disease in fish: choosing the right parental strain is critical for vaccine efficacy.  
787 *Vaccine* 31:5276–5280.
- 788 15. Ma J, Bruce TJ, Sudheesh PS, Knupp C, Loch TP, Faisal M, Cain KD. 2019. Assessment of cross-  
789 protection to heterologous strains of *Flavobacterium psychrophilum* following vaccination with a  
790 live-attenuated coldwater disease immersion vaccine. *Journal of Fish Diseases* 42:75–84.
- 791 16. Sudheesh PS, Cain KD. 2016. Optimization of efficacy of a live attenuated *Flavobacterium*  
792 *psychrophilum* immersion vaccine. *Fish & Shellfish Immunology* 56:169–180.
- 793 17. LaFrentz BR, LaPatra SE, Call DR, Cain KD. 2008. Isolation of rifampicin resistant *Flavobacterium*  
794 *psychrophilum* strains and their potential as live attenuated vaccine candidates. *Vaccine*  
795 26:5582–5589.
- 796 18. Madetoja J, Nystedt S, Wiklund T. 2003. Survival and virulence of *Flavobacterium psychrophilum*  
797 in water microcosms. *FEMS Microbiol Ecol* 43:217–223.
- 798 19. Kunttu HMT, Valtonen ET, Jokinen EI, Suomalainen LR. 2009. Saprophytism of a fish pathogen as  
799 a transmission strategy. *Epidemics* 1:96–100.
- 800 20. Sundell K, Wiklund T. 2011. Effect of biofilm formation on antimicrobial tolerance of  
801 *Flavobacterium psychrophilum*. *Journal of Fish Diseases* 34:373–383.
- 802 21. Kunttu HMT, Sundberg LR, Pulkkinen K, Valtonen ET. 2012. Environment may be the source of  
803 *Flavobacterium columnare* outbreaks at fish farms. *Environ Microbiol Rep* 4:398–402.
- 804 22. Benjamino J, Beka L, Graf J. 2018. Microbiome Analyses for Toxicological Studies. *Current*  
805 *Protocols in Toxicology* 77:e53.
- 806 23. Testerman T, Beka L, McClure EA, Reichley SR, King S, Welch TJ, Graf J. 2022. Detecting  
807 *Flavobacterial* Fish Pathogens in the Environment via High-Throughput Community Analysis.  
808 *Applied and Environmental Microbiology* 88.
- 809 24. Caporaso JG, Lauber CL, Walters WA, Berg-Lyons D, Lozupone CA, Turnbaugh PJ, Fierer N, Knight  
810 R. 2011. Global patterns of 16S rRNA diversity at a depth of millions of sequences per sample.  
811 *Proc Natl Acad Sci U S A* 108:4516–4522.
- 812 25. Bolyen E, Rideout JR, Dillon MR, Bokulich NA, Abnet CC, Al-Ghalith GA, Alexander H, Alm EJ,  
813 Arumugam M, Asnicar F, Bai Y, Bisanz JE, Bittinger K, Brejnrod A, Brislawn CJ, Brown CT, Callahan  
814 BJ, Caraballo-Rodríguez AM, Chase J, Cope EK, da Silva R, Diener C, Dorrestein PC, Douglas GM,  
815 Durall DM, Duvallet C, Edwardson CF, Ernst M, Estaki M, Fouquier J, Gauglitz JM, Gibbons SM,  
816 Gibson DL, Gonzalez A, Gorlick K, Guo J, Hillmann B, Holmes S, Holste H, Huttenhower C, Huttley  
817 GA, Janssen S, Jarmusch AK, Jiang L, Kaehler BD, Kang K bin, Keefe CR, Keim P, Kelley ST, Knights  
818 D, Koester I, Kosciulek T, Kreps J, Langille MGI, Lee J, Ley R, Liu YX, Loftfield E, Lozupone C, Maher  
819 M, Marotz C, Martin BD, McDonald D, McIver LJ, Melnik A v., Metcalf JL, Morgan SC, Morton JT,  
820 Naimey AT, Navas-Molina JA, Nothias LF, Orchanian SB, Pearson T, Peoples SL, Petras D, Preuss

- 821 ML, Pruesse E, Rasmussen LB, Rivers A, Robeson MS, Rosenthal P, Segata N, Shaffer M, Shiffer A,  
822 Sinha R, Song SJ, Spear JR, Swafford AD, Thompson LR, Torres PJ, Trinh P, Tripathi A, Turnbaugh  
823 PJ, Ul-Hasan S, van der Hooft JJJ, Vargas F, Vázquez-Baeza Y, Vogtmann E, von Hippel M, Walters  
824 W, Wan Y, Wang M, Warren J, Weber KC, Williamson CHD, Willis AD, Xu ZZ, Zaneveld JR, Zhang Y,  
825 Zhu Q, Knight R, Caporaso JG. 2019. Reproducible, interactive, scalable and extensible  
826 microbiome data science using QIIME 2. *Nature Biotechnology*. Nature Publishing Group  
827 <https://doi.org/10.1038/s41587-019-0209-9>.
- 828 26. Callahan BJ, McMurdie PJ, Rosen MJ, Han AW, Johnson AJA, Holmes SP. 2016. DADA2: high-  
829 resolution sample inference from Illumina amplicon data. *Nat Methods* 13:581.
- 830 27. Bokulich NA, Kaehler BD, Rideout JR, Dillon M, Bolyen E, Knight R, Huttley GA, Gregory Caporaso  
831 J. 2018. Optimizing taxonomic classification of marker-gene amplicon sequences with QIIME 2's  
832 q2-feature-classifier plugin. *Microbiome* 6:1–17.
- 833 28. Quast C, Pruesse E, Yilmaz P, Gerken J, Schweer T, Yarza P, Peplies J, Glöckner FO. 2013. The  
834 SILVA ribosomal RNA gene database project: Improved data processing and web-based tools.  
835 *Nucleic Acids Research* 41.
- 836 29. R Core Team. 2017. R: A language and environment for statistical computing. [https://www.R-](https://www.R-project.org/)  
837 [project.org/](https://www.R-project.org/). R Foundation for Statistical Computing, Vienna.
- 838 30. Jordan E Bisanz. 2018. qiime2R: Importing QIIME2 artifacts and associated data into R sessions.  
839 0.99.
- 840 31. McMurdie PJ, Holmes S. 2013. phyloseq: An R Package for Reproducible Interactive Analysis and  
841 Graphics of Microbiome Census Data. *PLoS ONE* 8:e61217.
- 842 32. Wickham H. 2016. ggplot2: Elegant Graphics for Data Analysis. 978-3-319-24277-4. Springer-  
843 Verlag, New York.
- 844 33. Barnett D. 2021. david-barnett/microViz: microViz 0.7.7  
845 <https://doi.org/10.5281/ZENODO.4898887>.
- 846 34. Oksanen J. 2020. vegan: Community Ecology Package. 3.5-7.
- 847 35. Goffredo M, Mass K, Parks EJ, Wagner DA, McClure EA, Graf J, Savoye M, Pierpont B, Cline G,  
848 Santoro N. 2016. Role of gut microbiota and short chain fatty acids in modulating energy harvest  
849 and fat partitioning in youth. *Journal of Clinical Endocrinology and Metabolism* 101:4367–4376.
- 850 36. Díaz-Riaño J, Posada L, Acosta IC, Ruíz-Pérez C, García-Castillo C, Reyes A, Zambrano MM. 2019.  
851 Computational search for UV radiation resistance strategies in *Deinococcus swuensis* isolated  
852 from Paramo ecosystems. *PLOS ONE* 14:e0221540.
- 853 37. Donlan RM. 2002. Biofilms: Microbial Life on Surfaces. *Emerging Infectious Diseases* 8:881.
- 854 38. Thomen P, Robert J, Monmeyran A, Bitbol AF, Douarche C, Henry N. 2017. Bacterial biofilm under  
855 flow: First a physical struggle to stay, then a matter of breathing. *PLoS ONE* 12.

856 39. Everson JL, Jones DR, Taylor AK, Rutan BJ, Leeds TD, Langwig KE, Wargo AR, Wiens GD. 2021.  
857 Aquaculture Reuse Water, Genetic Line, and Vaccination Affect Rainbow Trout (*Oncorhynchus*  
858 *mykiss*) Disease Susceptibility and Infection Dynamics. *Frontiers in Immunology* 12:3894.

859
